# Supplementary material for: Interprofessional evidence-based counselling programme for complementary and integrative healthcare in patients with cancer: study protocol for the controlled implementation study CCC-Integrativ
Source: PubMed Central journal article supplement — BMJ Open. 2022 Feb 11;12(2):e055076. doi: 10.1136/bmjopen-2021-055076 (PMC8845169; doi:10.1136/bmjopen-2021-055076), 2022-02-11
Supplement: bmjopen-2021-055076.draft_revisions.pdf [file bmjopen-2021-055076.draft_revisions.pdf]

# BMJ Open

BMJ Open is committed to open peer review. As part of this commitment we make the peer review history of every article we publish publicly available.

When an article is published we post the peer reviewers' comments and the authors' responses online. We also post the versions of the paper that were used during peer review. These are the versions that the peer review comments apply to.

The versions of the paper that follow are the versions that were submitted during the peer review process. They are not the versions of record or the final published versions. They should not be cited or distributed as the published version of this manuscript.

BMJ Open is an open access journal and the full, final, typeset and author-corrected version of record of the manuscript is available on our site with no access controls, subscription charges or pay-per-view fees (<http://bmjopen.bmj.com>).

If you have any questions on BMJ Open's open peer review process please email [info.bmjopen@bmj.com](mailto:info.bmjopen@bmj.com)

# BMJ Open

## Interprofessional evidence-based counselling programme for Complementary and Integrative Health Care in cancer patients – study protocol for the controlled implementation study CCC - Integrativ

|                               |                                                                                                                                                                                                                                                                                                                                                                                                                                                                                                                                                                                                                                                                                                                                                                                                                                                                                                                                                                                                                                                                                                                                                                                                                                                                                                                                                                               |
|-------------------------------|-------------------------------------------------------------------------------------------------------------------------------------------------------------------------------------------------------------------------------------------------------------------------------------------------------------------------------------------------------------------------------------------------------------------------------------------------------------------------------------------------------------------------------------------------------------------------------------------------------------------------------------------------------------------------------------------------------------------------------------------------------------------------------------------------------------------------------------------------------------------------------------------------------------------------------------------------------------------------------------------------------------------------------------------------------------------------------------------------------------------------------------------------------------------------------------------------------------------------------------------------------------------------------------------------------------------------------------------------------------------------------|
| Journal:                      | <i>BMJ Open</i>                                                                                                                                                                                                                                                                                                                                                                                                                                                                                                                                                                                                                                                                                                                                                                                                                                                                                                                                                                                                                                                                                                                                                                                                                                                                                                                                                               |
| Manuscript ID                 | bmjopen-2021-055076                                                                                                                                                                                                                                                                                                                                                                                                                                                                                                                                                                                                                                                                                                                                                                                                                                                                                                                                                                                                                                                                                                                                                                                                                                                                                                                                                           |
| Article Type:                 | Protocol                                                                                                                                                                                                                                                                                                                                                                                                                                                                                                                                                                                                                                                                                                                                                                                                                                                                                                                                                                                                                                                                                                                                                                                                                                                                                                                                                                      |
| Date Submitted by the Author: | 21-Jul-2021                                                                                                                                                                                                                                                                                                                                                                                                                                                                                                                                                                                                                                                                                                                                                                                                                                                                                                                                                                                                                                                                                                                                                                                                                                                                                                                                                                   |
| Complete List of Authors:     | Valentini, Jan; Universitätsklinikum Tübingen, Institute for General Practice and Interprofessional Care<br>Fröhlich, Daniela; Universitätsklinikum Tübingen, Institute for General Practice and Interprofessional Care<br>Stolz, Regina; Universitätsklinikum Tübingen<br>Mahler, Cornelia; Universitätsklinikum Tübingen, Institute for Health Sciences, Department of Nursing Science<br>Martus, Peter; University Hospital Tübingen, Institute for Clinical Epidemiology and Applied Biostatistics<br>Klafke, Nadja; University Hospital Heidelberg, Department of General Practice and Health Services Research<br>Horneber, Markus; Klinikum Nürnberg, Department of Internal Medicine, Division of Pneumology, Paracelsus Medical University<br>Frasch, Jona; aQua Institute for Applied Quality Improvement and Research in Health Care<br>Kramer, Klaus; University Hospital and Faculty of Medicine Ulm, Department of Integrative Medicine<br>Bertz, Hartmut; Medical Center-University of Freiburg, Department of Medicine I, Faculty of Medicine<br>Grün, Barbara; National Centre for Tumor Diseases Heidelberg, Department of Medical Oncology<br>Tomaschko-Ubeländer, Katrin; AOK Baden-Württemberg, Fachbereich Integriertes Leistungsmanagement<br>Joos, Stefanie; Universitätsklinikum Tübingen, Institute for General Practice and Interprofessional Care |
| Keywords:                     | ONCOLOGY, COMPLEMENTARY MEDICINE, Nutritional support < ONCOLOGY, PREVENTIVE MEDICINE, Herbal medicine < THERAPEUTICS, Adult oncology < ONCOLOGY                                                                                                                                                                                                                                                                                                                                                                                                                                                                                                                                                                                                                                                                                                                                                                                                                                                                                                                                                                                                                                                                                                                                                                                                                              |
|                               |                                                                                                                                                                                                                                                                                                                                                                                                                                                                                                                                                                                                                                                                                                                                                                                                                                                                                                                                                                                                                                                                                                                                                                                                                                                                                                                                                                               |

SCHOLARONE™  
Manuscripts

# Interprofessional evidence-based counselling programme for Complementary and Integrative Health Care in cancer patients—study protocol for the controlled implementation study CCC - Integrativ

---

Jan Valentini<sup>1</sup>, Daniela Fröhlich<sup>1</sup>, Regina Stolz<sup>1</sup>, Cornelia Mahler<sup>2</sup>, Peter Martus<sup>3</sup>, Nadja Klafke<sup>4</sup>, Markus Horneber<sup>5</sup>, Jona Frasch<sup>6</sup>, Klaus Kramer<sup>7</sup>, Hartmut Bertz<sup>8</sup>, Barbara Grün<sup>9</sup>, Katrin Tomaschko<sup>10</sup>, Stefanie Joos<sup>1</sup> On behalf of the CCC-Integrativ study group

<sup>1</sup>Institute for General Practice and Interprofessional Care, University Hospital and Faculty of Medicine Tuebingen, Tuebingen, Germany

<sup>2</sup>Department of Nursing Science, Institute for Health Sciences, University Hospital and Faculty of Medicine Tuebingen, Tuebingen, Germany

<sup>3</sup>Institute for Clinical Epidemiology and Applied Biostatistics, University Hospital and Faculty of Medicine Tuebingen, Tuebingen, Germany

<sup>4</sup>Department of General Practice and Health Services Research, University Hospital Heidelberg, Marsilius-Arkaden, Turm West, Im Neuenheimer Feld 130.3, 69120 Heidelberg, Germany

<sup>5</sup>Department of Internal Medicine, Division of Pneumology, Paracelsus Medical University, Klinikum Nuernberg, Germany

<sup>6</sup>aQua Institute for Applied Quality Improvement and Research in Health Care, 37073 Goettingen, Germany

<sup>7</sup>Department of Integrative Medicine, University Hospital and Faculty of Medicine Ulm, Germany

<sup>8</sup>Department of Medicine I, Medical Centre University of Freiburg, Faculty of Medicine, University of Freiburg, Germany

<sup>9</sup>Department of Medical Oncology, National Centre for Tumor Diseases, Heidelberg, Germany

<sup>10</sup>AOK Baden-Württemberg Hauptverwaltung, Fachbereich Integriertes Leistungsmanagement, Presselstraße 19, 70191 Stuttgart, Germany

jan.valentini@med.uni-tuebingen.de  
daniela.froehlich2@med.uni-tuebingen.de  
Regina.Stolz@med.uni-tuebingen.de  
Cornelia.Mahler@med.uni-tuebingen.de  
Peter.Martus@med.uni-tuebingen.de  
Nadja.Klafke@med.uni-heidelberg.de  
markus.horneber@klinikum-nuernberg.de  
jona.frasch@aqua-institut.de  
klaus.kramer@uniklinik-ulm.de  
hartmut.bertz@uniklinik-freiburg.de  
barbara.gruen@med.uni-heidelberg.de  
Katrin.Tomaschko@bw.aok.de  
Stefanie.Joos@med.uni-tuebingen.de

Correspondence to Dr Jan Valentini; jan.valentini@med.uni-tuebingen.de

## Abstract

### Introduction

According to international literature, cancer patients wish to have information on complementary and integrative health care (CIH). Medical guidelines recommend actively approaching cancer patients discussing potential benefits and risks of individual CIH methods. While some CIH methods e.g. acupuncture and yoga can be recommended based on high quality studies, some other CIH methods e.g. herbal drugs bear the risk of interactions with chemotherapeutics. Therefore, an evidence-based interprofessional counselling programme on CIH will be implemented at four Comprehensive Cancer Centres (CCC) in the federal state of Baden-Wuerttemberg, Germany.

### Methods and analysis

A complex intervention with elements on patient, provider, and system level will be developed and evaluated within a multilayer evaluation design with confirmatory evaluation on patient level. Patients with a cancer diagnosis within the last 6 months will receive 3 individual counselling sessions on CIH within 3 months (=intervention on patient level). The counselling will be provided by an interprofessional team of medical and nursing staff. For this purpose, an intensive online training programme was developed for the project (=intervention on provider level). Moreover, training events on basics of CIH are offered in outpatient setting (=intervention on system level). Primary outcome of the evaluation at patient level is patient activation measured with the PAM-13 after 3 months. Secondary outcomes e.g. quality of life, self-efficacy and clinical parameters will be assessed at baseline, after 3 months and at 6 months follow-up. The intervention group (n=1000) will be compared with a control group (n=500, no CIH counselling) with the same follow up times but not concurrent calendrical dates. Moreover, use of health services will be compared with a reference group (n= 2000) based on health insurance data. A qualitative-quantitative process evaluation as well as a health economic evaluation will identify relevant barriers and enabling factors for a later roll-out.

### Ethics and dissemination.

The study has been approved by the appropriate Institutional Ethical Committee of the University of Tuebingen, No. 658/2019B01. The results of these studies will be disseminated to academic audiences and in the community.

### Registration

German Clinical Trials Register (DRKS), DRKS00021779 registered on 12<sup>th</sup> June 2020

### Keywords

Oncology, comprehensive cancer centre, complementary medicine and integrative health care, Interprofessional, integrative medicine, supportive therapy, counselling intervention, patient activation, controlled study

## Strengths and limitations of this study

- For the first time a transsectoral, interprofessional, evidence-based counselling programme for Complementary and Integrative Health Care will be implemented at Comprehensive Cancer Centres Baden-Wuerttemberg, Germany.
- The complex evaluation will be conducted at the patient, provider, and system levels within a controlled design.
- The guiding (confirmatory) hypothesis is at patient level measured by patient activation (PAM-13).
- Randomization at patient level is not possible due to the naturalistic study design.
- On provider level a training programme for the counselling team is designed and evaluated as blended-learning programme with online (asynchronous) and onsite (synchronous) formats.

For peer review only

## Introduction

According to previous studies there is a high use of naturopathic/complementary approaches (CIH= complementary and integrative health care) among cancer patients. A meta-analysis shows that about 40% of all oncology patients use CIH<sup>1</sup>, for patients with breast cancer up to 80% can be assumed<sup>2</sup>. For some CIH methods, positive effects in cancer patients have been shown in RCTs and meta-analyses e.g. meditation, particularly mindfulness-based stress reduction for mood disturbance and depression, Yoga and Tai Ji for improving quality of life and fatigue, acupuncture and acupressure to reduce nausea and pain, individual phytotherapeutics and herbal medicines such as ginger for nausea<sup>3-5</sup>. In addition, many of these CIHs have the goal to empower and activate patients as well as to improve self-efficacy.<sup>6</sup> The promotion of patient activation<sup>7</sup>, self-management strategies<sup>8</sup>, and health literacy<sup>9</sup> have been shown to empower patients with cancer<sup>10</sup> and contribute to reduce the use of health services<sup>11</sup>.

However, CIH also entails clinical risks; e.g. phytotherapeutics and micronutrients especially in high doses (vitamins, selenium) can interact with chemotherapy<sup>12,13</sup>. A further risk arises from the fact that patients often look for help outside conventional health care structures (e.g. alternative practitioners) with unforeseeable health consequences such as delayed diagnosis and failure to provide indicated treatments<sup>14,15</sup>. In addition, there are the risks for economic harm as the majority of costs for CIH procedures are not covered by public insurance.<sup>16</sup> In 20% up to 77% of cases cancer patients do not inform their treating physicians when making use of CIH<sup>17-19</sup>. This lack of communication may endanger the doctor-patient relationship and contribute to discontinuation of conventional therapy<sup>14,20,21</sup>.

Patient-centred care for cancer includes supportive measures that enable patients to cope as well as possible with their diagnosis and therapy, including its side effects<sup>22-24</sup>. These supportive measures may also include CIH methods. Therefore, according to current German S3 guidelines on breast cancer, cervical cancer, ovarian cancer as well as the guidelines on complementary medicine in the treatment of oncology patients<sup>3</sup>, palliative medicine and psycho-oncology, there is a consensus recommendation that all patients should be asked about their need for information on their use of CIH procedures<sup>3,25</sup>. However, this recommendation contrasts starkly with a lack of human resources in oncologic clinics and insufficient CIH knowledge among medical and nursing staff. Therefore, this recommendation could hardly be implemented so far in everyday care and the topic of CIH is often not at all or not sufficiently addressed in patient communication. The aim of the CCC-Integrativ study is to develop and evaluate a complex intervention with elements on patient, provider and system level to improve CIH for cancer patients. In detail, we aim to evaluate whether interprofessional counselling about CIH improves patient activation and patients' confidence in contributing to their health.

## Methods and analysis

### Theoretical framework and objectives

The project pursues a health services research approach and therefore objectives and interventions will be differentiated in relation to the micro-, meso- and macro-level.

On the **micro (patient)-level** the project aims to activate patients and promote their self-efficacy (see Fig. 1). It is expected that by enhanced empowerment the patient's quality of life and clinical outcomes will be improved, which can in turn lead to a reduced use of health services in the further course <sup>26</sup>.

Please insert Fig 1 here

Objectives at the **meso (provider) level** are an improvement of the knowledge and communication skills regarding CIH as well as improved job satisfaction and interprofessional collaboration between doctors and nurses within the care setting.

At the **macro (system)-level** the objectives include costs and a transsectoral increase in knowledge of CIH (see Fig.2).

Please insert Fig 2 here

### Setting and Study design

Within the CCC-Integrativ study an evidence-based interprofessional counselling programme on CIH for oncology patients will be implemented and evaluated at the four Comprehensive Cancer Centres (CCC) (Freiburg, Heidelberg, Tuebingen-Stuttgart, Ulm) in Baden-Wuerttemberg. Comprehensive Cancer Centres are implemented at most university hospitals in Germany to ensure a high standard of medical care for oncology patients and are considered centres of excellence in oncology.

As described above CCC-Integrativ will be evaluated at patient, provider and system level, whereby the confirmatory testing will be on patient level. The accompanying process evaluation, which also analyses aspects of the micro-, meso- and macro- level is presented in detail in a separate protocol.

The total study duration is 36 months. For the individual study participant, the study including the follow-up survey lasts 6 months (intervention group and control group). The preparation period runs from month 1-6, the primary data collection in the control group from month 7 to 18 (recruitment month 7-9). Data collection in the intervention group from month 13-30 (recruitment month 13-24).

The intervention group is compared with a control group and a reference group. The control group is recruited 6 months before the start of the intervention phase. Identical outcome parameters are

1  
2  
3 collected. The reference group results from claims data of the statutory health insurance of the  
4 Allgemeine Ortskrankenkasse Baden-Wuerttemberg (AOK BW) without additional primary data  
5 collection. The reference group allows us to examine representativity of the study population  
6 compared to the target population (members of AOK-BW). If differences between the control group  
7 and the reference group are detected, i.e. a study effects are present, these will be accounted for in  
8 the comparison of the reference group with the intervention group in order to disentangle study  
9 effects and intervention effects.  
10  
11  
12  
13  
14

15 A classical parallel group design with randomization at patient level did not seem feasible, as previous  
16 studies have shown that patients with a high use or need for counselling on CIH cannot be randomized  
17 <sup>23</sup>. Also, cluster randomization had to be rejected due to possible contamination problems. Thus, we  
18 decided to choose different time intervals within the study period for controls and intervention  
19 patients.  
20  
21  
22  
23  
24  
25

### 26 27 **Intervention on patient level**

28 The intervention consists of an interprofessional, evidence-based counselling service for patients with  
29 counselling needs in the field of CIH. The CIH counselling service is provided by interprofessional teams  
30 consisting of specially trained physicians and nurses at each of the four participating CCCs and  
31 integrated into the existing structures at the four participating CCCs in Freiburg, Heidelberg, Tübingen-  
32 Stuttgart und Ulm. Our concept for counselling follows an evidence-based approach, integrating  
33 patient preferences and individual medical and nursing expertise.  
34  
35  
36  
37  
38  
39

### 40 **Intervention and control group**

#### 41 Intervention group

42 Patients of the intervention group will be offered interprofessional individual counselling. Eligible  
43 patients will receive at least three counselling sessions on evidence-based nursing and/or medical  
44 interventions within three months. The first counselling session will be face-to-face and  
45 interprofessional and is planned for a duration of 60 minutes. The subsequent two counselling session  
46 may be mono-professional and performed by telephone or as a video counselling with a duration of  
47 approximately 30 minutes.  
48  
49  
50  
51  
52

53 The counselling concept takes into account the resources of the patient, integrates conventional health  
54 care (as provided by the CCCs in routine care) and provides information on CIH and care services with  
55 CIH. The central point of the counselling is the specific CIH counselling needs of the patient (see Fig.  
56 3). In addition to the specific patient needs, the topics of nutrition, exercise and stress management  
57 are addressed as resources. If there is a need for further counselling on these three topics, referrals  
58  
59  
60



1  
2  
3 are made to the specific counselling services for nutrition, exercise and psychooncology offered in all  
4 participating CCCs.  
5  
6  
7

8 Please insert Fig 3 here  
9  
10

11 If required within a counselling session, easy to understand information leaflets developed in the  
12 preparation phase for the most relevant symptoms and CIH methods and/or prescriptions for  
13 phytotherapeutics are handed out to patients to promote patient activation. In case of  
14 recommendation of external applications, these can also be shown to the patient on site. Furthermore,  
15 counselling on where to find serious information about CIH on the internet as well as how to evaluate  
16 CIH providers and CIH products will be provided.  
17  
18  
19  
20  
21

22 To standardize the counselling process a structured guideline for the consulting teams is developed  
23 before intervention starts and will be practiced in the training programme.  
24  
25

#### 26 Control Group and reference group

27 The control group and the reference group receive conventional health care as usual provided by the  
28 CCCs (treatment as usual).  
29  
30  
31  
32  
33  
34

### 35 **Participants**

36 Eligible participants consist of outpatient oncology patients at the four Comprehensive Cancer Centres.  
37 (Tübingen-Stuttgart, Ulm, Freiburg and Heidelberg) of the Federal State of Baden-Wuerttemberg,  
38 Germany).  
39  
40  
41

### 42 **In- and exclusion criteria**

43 The following inclusion criteria apply to the intervention group and the control group:  
44

- 45 • Diagnosis of cancer incl. progression or recurrence within the last 6 months (all cancer entities  
46 can be included).
- 47 • Patient must be able to attend a counselling on site.
- 48 • Treatment at one of the participating CCCs or consultation for a second opinion
- 49 • Age  $\geq 18$  years
- 50 • Need for CIH counselling (attested by actively contacting the local counselling centre by email,  
51 phone or in person).
- 52 • Present signed declaration of consent to the study and to data protection (Informed consent).  
53  
54  
55  
56  
57  
58

59 Exclusion criteria:

- 60 • For intervention group: participation in control group

- Language or cognitive impairments preventing patients from completing questionnaires independently

## Recruitment

### Recruitment procedure in the intervention group:

Information materials on the project (as flyers, brochures, and a website) are displayed in outpatient clinics, day clinics and the other counselling centres at the four CCCs. In addition, the project will be presented at other counselling services, support groups and established formats (senior physician conferences, nursing service meetings, etc.) in each CCC. In the preparatory phase, information events will also be held at each CCC to report on the project. Patients are to become aware of the counselling via flyer, newspaper reports, word-of-mouth information, via the treating physicians and via actively approach by the study staff.

### Recruitment procedure in the control group:

Patients in the control group are actively approached by study staff (doctors, nurses, study assistants) during waiting times in the rooms of the CCC as in day clinic. The patients are informed about the study and asked whether they would enter the control group. The time points of data collection as well as the instruments used to collect the primary and secondary outcomes correspond to those in the intervention group (T1, T2, T3). Since the counselling service is not yet established, inclusion in the intervention group is not yet possible. As compensation for their time, the patients are offered the CIH counselling service after the end of the observation period of 6 months (outside the study setting).

### Recruitment procedure in the reference group:

As there is no primary data collection in the reference group, no recruitment is needed. Instead, secondary data from the AOK-BW will be used in pseudonymized form.

## Intervention on provider level

### **Blended-learning training programmes for counselling teams**

The training programme is designed as blended-learning with online (asynchronous) and onsite (synchronous) formats such as webinar or face-to-face format. The contents of the training program were developed during the preparatory phase of the project on the basis of existing guidelines and expertise from two previous studies: the CONGO-study and the project KOKON. Data from KOKON ([www.kompetenznetz-kokon.de](http://www.kompetenznetz-kokon.de)) show the specific information that doctors need for good counselling<sup>27</sup> and how this can be implemented successfully<sup>28</sup>, whereas CONGO focused on nursing applications in the context of supportive cancer care<sup>29,30</sup>. The online content of CCC-Integrativ is presented through

1  
2  
3 an online learning management system (ILIAS-software). Training consists of evidence-based text  
4 material, live lectures and asynchronous lectures on individual CIH methods and of communication  
5 training. For the latter, training with simulation patients was integrated into the synchronous online  
6 formats. Structure and overall contents of the blended-learning training programme will be presented  
7 in detail a separate publication (in preparation).  
8  
9

### 10 11 12 **Tool box for counselling teams**

13  
14 In order to achieve standardized and evidence-based counselling on CIH, specific symptom-driven  
15 guidelines for the most relevant symptoms (e.g. on chemotherapy induced nausea and vomiting) are  
16 developed on the basis of a structured literature research and expert consensus process. Altogether,  
17 20 symptom-driven guidelines will be developed to provide a basic counselling source of information  
18 for the counselling teams.  
19  
20  
21  
22

### 23 24 **Knowledge database on CIH**

25  
26 Within the KOKON Projekt (KOKONbase) a knowledge database on clinical efficacy and safety of  
27 complementary medicine in oncology was implemented. The contents of the database are linked to  
28 the international information portal of the CAM Cancer Project <sup>31</sup> and including free access via  
29 Onkopedia (<https://www.onkopedia.com/de>), the guideline portal of the German Society for  
30 Haematology and Medical Oncology. During the CCC-Integrativ Study the database will be constantly  
31 updated and supplemented with content on complementary nursing.  
32  
33  
34  
35

### 36 37 **Interprofessional team building**

38  
39 Interprofessional counselling requires interprofessional team building of the counselling teams (nurse  
40 and physician). Therefore, workshops to promote interprofessional collaboration using the TEAM<sup>c</sup>  
41 approach<sup>32 33</sup> are performed for each counselling team either onsite or online (synchronous) and  
42 complement the blended-learning programme.  
43  
44  
45  
46  
47  
48

### 49 50 **Intervention on system level**

51 As part of the system-level intervention, basic training on CIH is provided to healthcare professionals  
52 on a cross-sectoral level, ranging from university hospitals to primary care. The target groups are e.g.  
53 health workers in the CCCs, general practitioners and ambulatory care services. The aim of this training  
54 is to achieve a common understanding on the term CIH, discuss possible indications for the application  
55 as well as potential risks of CIH based on scientific literature and to address reliable sources of  
56 information on CIH. The number of training sessions and the exact target persons are not fixed in  
57  
58  
59  
60

1  
2  
3 advance, but will be determined by the demand of the different groups of actors during the  
4 intervention phase.  
5  
6  
7  
8

## 9 **Primary and secondary outcomes on patient level**

### 11 **Primary outcome**

12 The primary outcome parameter with regard to assessing the intervention effect is patient activation,  
13 operationalized by the Patient Activation Measure questionnaire of the German version (PAM-13-D)  
14 after 3 months (T2) <sup>7 34</sup>. The PAM-13 is widely used internationally, also within the oncology setting,  
15 and has been validated in German. It has shown to be a valid and reliable predictor of patient activation  
16 <sup>34 35</sup>. The PAM-13 measures the extent to which a patient actively participates in his or her treatment.  
17 Furthermore, it measures the patient's active role in managing his/her own health and the extent to  
18 which he/she feels competent to fulfil that role. This construct includes aspects of health and patient  
19 knowledge, skill, and confidence for self-management and therefore allows us to omit other concept-  
20 specific questionnaires, reducing the patient's overall burden of filling out questionnaires. A  
21 correlation between a higher level of patient activation (measured by the PAM-13) and better health  
22 outcomes, improved treatment adherence and a reduction in healthcare costs has been shown <sup>36</sup>. The  
23 PAM-13-D is completed by the patients themselves. In the control and the intervention group PAM-  
24 13-D will be measured at baseline (T1), after 3 months (T2) and 6 months follow-up (T3) according to  
25 table 1.  
26  
27  
28  
29  
30  
31  
32  
33  
34  
35  
36  
37  
38  
39

### 40 **Secondary outcomes**

41 One part of the secondary outcomes at patient level is collected via primary data collection, another  
42 part is based on routine data.  
43  
44

45 Secondary outcomes via primary data collection include quality of life, self-efficacy, depression,  
46 fatigue, symptom management, health literacy and health care utilization. All outcomes will be  
47 measured with validated instruments and assessed at baseline (T1), after 3 months (T2) and 6 months  
48 follow-up (T3) as described in table 1.  
49  
50  
51  
52  
53  
54  
55  
56  
57  
58  
59  
60

patients

| outcomes                                     | instrument                              | items | T1<br>Baseline | T2<br>3 months | T3<br>6 months<br>follow up |
|----------------------------------------------|-----------------------------------------|-------|----------------|----------------|-----------------------------|
| <u>primary outcome</u><br>patient activation | PAM-13                                  | 13    | x              | x              | x                           |
| <u>secondary outcomes</u>                    |                                         |       |                |                |                             |
| health status                                | EQ 5D                                   | 5     | x              | x              | x                           |
| self-efficacy                                | SES6G                                   | 6     | x              | x              | x                           |
| unmet needs                                  | NEQ                                     | 27    | x              |                |                             |
| quality of life                              | EORTC-QLQ-C30<br>(only question 29 +30) | 2     | x              | x              | x                           |
| depression, agitation                        | PHQ-9                                   | 9     | x              | x              | x                           |
| fatigue                                      | EORTC FA 12                             | 12    | x              | x              | x                           |
| measure yourself concerns and<br>wellbeing   | MYCaW                                   | 7     | x              | x              | x                           |
| symptoms, therapy-assisted                   | MIDOS2                                  | 11    | x              | x              | x                           |
| single item literacy screener                | SILS                                    | 1     | x              |                |                             |
| health care utilization questionnaire        | HCU-Q (adapted)                         | 11    | x              | x              | x                           |
| <u>sociodemographic data</u>                 |                                         | 26    | x              |                |                             |
| <u>medical data</u>                          |                                         | 10    | x              | x              | x                           |

Tab. 1 Primary and secondary outcomes at patient level in the intervention and control group

The following clinical parameters, not shown in Tab. 1, are also collected at patient level (survey dates are given in brackets): diagnosis including TNM classification (T1), date of primary diagnosis of cancer (T1), if applicable, diagnosis of recurrence/progression (T1, T2, T3), ongoing or planned oncological therapies (chemotherapy, surgery etc.) (T1, T2, T3).

The analyses of the routine data are based on claims data collected for billing purposes from the medical insurance company - the Allgemeine Ortskrankenkasse Baden-Wuerttemberg (AOK BW). The AOK BW is the fifth largest health insurance fund in Germany and the largest in Baden-Wuerttemberg with approximal 4.5 million insured persons. These data come from all AOK BW-insured persons who had received an ICD-10 cancer diagnosis in the relevant time periods. Claims data cover the inpatient and outpatient care, prescription drugs, therapeutics remedies and medical aids.

## Sample size

The number of cases for the intervention group and control group was initially determined on the basis of pragmatic considerations (existing staff and structures, feasibility, statistical power) regarding the implementation character of the study. Thus, the sample size of the intervention group was set at 250 patients per CCC (total n=1000), while 500 patients (n=125 per site) were calculated for the control

1  
2  
3 group. For the reference group, a total of 2000 patients are to be analysed (n=500 patients per CCC)  
4 (see Fig.4).  
5  
6

7 Consistent data on distribution of the primary endpoint PAM-13 is found in the literature. In a paper  
8 by Rademakers<sup>37</sup>, sample size and standard errors are each given for a Danish, a Dutch, a German and  
9 a Norwegian sample with a total of approx. 3500 patients. Back-calculation to the standard deviation  
10 yields values between 14.49 and 14.61. In a study by Bates<sup>38</sup>, standard deviations between 14.3 and  
11 14.8 were found. We therefore conservatively assume a standard deviation of 15 in our planning. In  
12 the first study mentioned, a difference of 6.5 points was seen under intervention (68.5 vs. 75.0). With  
13 a study effect in the control group (e.g. caused by using the instrument twice) of 30% (= 1.95 points)  
14 we could expect a difference of 4.55 points. Conservatively assuming a difference of 3 points and the  
15 already justified standard deviation of 15 points in the main outcome parameter PAM-13 between  
16 intervention and control group, a sample size of 1185 patients is calculated (type 2 error of 0.10 and  
17 ratio of 2:1 between intervention n=790, and control group, n=395). Assuming a drop-out of 20%, 988  
18 patients must be included in the intervention group and 494 must be included in the control group.  
19 Thus, we aim to recruit 1000 patients in the intervention group and 500 patients in the control group.  
20  
21  
22  
23  
24  
25  
26  
27  
28  
29

30 With the sample size of 1500 patients (1000+500) minus 20% drop outs, a group difference of 3 points  
31 on the PAM-13 would have a power of 90%. By adjusting the baseline in a covariance analysis, a degree  
32 of freedom is lost, but it can be assumed that due to the reduction in dispersion after adjustment, the  
33 power should be even higher.  
34  
35  
36  
37  
38

39 Please insert Fig 4 here  
40  
41  
42

### 43 **Data analysis**

44 Electronic data collection from the patients' questionnaires is recorded using REDCap (Research  
45 Electronic Data Capture) a browser-based software for clinical and translational research<sup>39</sup>. All  
46 quantitative data will be transformed and imported into SPSS for further statistical analysis.  
47  
48

49 Analysis of primary data: The primary outcome parameter for the comparison of the intervention  
50 group with the control group is patient activation, which is measured by the Patient Activation  
51 Measure PAM-13 after 3 months. For the primary outcome analysis of covariance with baseline  
52 adjustment and adjustment for study centre as a categorical variable will be applied. Secondary  
53 analyses of the primary endpoint include an additional analysis of covariance adjusted for age  
54 (quantitative), sex, diagnosis, and disease stage as well as a mixed model for T1, T2 and T3 to analyse  
55 the temporal trend and test for maintenance effects at T3. Quantitative secondary endpoints will be  
56  
57  
58  
59  
60

1  
2  
3 analysed analogously to PAM, categorical data will be analysed using identically adjusted logistic  
4 regression models. For analyses of the secondary outcomes, p-values are reported but are not to be  
5 interpreted confirmatorily. The primary analysis population will be the intent to treat population which  
6 includes all subjects with baseline assessment. Multiple imputation methods are used to replace  
7 missing values. Imputation will be based on baseline values. Confirmatory interim analyses are not  
8 planned. The level of significance will be 0.05 (two-sided).

9  
10  
11 Analysis of secondary data: Secondary data as described above will be compared between the  
12 intervention, the control and the reference group. In a first step, the control group will be compared  
13 to the reference group to assess possible selection bias and study effects. In a second step, the  
14 intervention group is compared to the reference group with adjustments derived from the first step  
15 comparison.

### 21 22 23 24 **Process evaluation**

25 In addition to the analyses mentioned above, a detailed qualitative-quantitative process evaluation  
26 will be conducted. This process evaluation is based on the Consolidated Framework for  
27 Implementation Research (CFIR), a recognized framework in implementation research <sup>40</sup>. In addition  
28 to evaluating the the perspectives of patients and providers on the counselling sessions, the process  
29 evaluation aims to identify significant barriers and facilitating factors for a successful implementation  
30 as well as for a later transferability of the intervention into standard care. All details regarding the  
31 concept and planned analyses can be found in a separate publication (in preparation).

### 32 33 34 35 36 37 38 39 **Health economic evaluation**

40 To evaluate the intervention's efficiency, a cost effectiveness and cost utility analysis will be  
41 performed. To that end, the intervention and control group will be compared on both the absolute  
42 and incremental costs and effects of care. The main analysis is conducted from the perspective of the  
43 insurees of the statutory health insurances, meaning that costs and effects incurred by the statutory  
44 health insurance as well as by the patients themselves are counted. A societal perspective will be  
45 considered in a sensitivity analysis. On the cost side, the intervention specific costs, the costs of  
46 inpatient and outpatient care, the costs of prescription drugs, therapeutic remedies, aids, informal  
47 care, productivity losses and CIH are considered. Data is collected using an adapted version of the  
48 healthcare utilization questionnaire (HCU-Q) <sup>41</sup> and supplemented for part of the intervention and  
49 control group with information from the AOK BW routine data (billing data). Using an incremental cost-  
50 effectiveness ratio, the efficiency of the intervention is quantified. This enables statements to be made  
51 about the programme's incremental costs per increment in quality of life and patient activation. Data  
52 from the reference group serves to supplement and validated the data and analyses used and helps

1  
2  
3 with contextualizing the results. The time horizon of the analysis is 6 months. Both costs and effects  
4 are discounted at 3% p.a.. In a deterministic sensitivity analysis, discounting rates of both 0% and 5%  
5 will be applied. Uncertainty will be accounted for in sensitivity as well as subgroup analyses.  
6  
7  
8  
9  
10

## 11 **Trial Status**

12 Recruitment of the control group (n=502) was successfully completed in January 2021. The  
13 counselling for the intervention group started in January 2021. Last-Patient out is expected for March  
14 2022. Analyses will be completed in December 2022.  
15  
16  
17  
18  
19  
20

## 21 **Patient and public involvement**

22 Patients from different oncological support groups were involved during the preparation of the  
23 study. The questionnaires used in the study as well as patient informational materials on CIH were  
24 developed in cooperation with support groups. Given the nature of our naturalistically controlled  
25 trial, the public and media were addressed actively with information on the project, lectures on CIH  
26 were held on patient days etc. in order to achieve our recruitment goal.  
27  
28  
29  
30  
31  
32

## 33 **Ethical considerations, data protection aspects and dissemination**

34 The study has been approved by the appropriate Institutional Ethical Committee of the participating  
35 medical faculties (Freiburg, Heidelberg, Tuebingen, Ulm), No. 658/2019BO1.  
36  
37  
38

39 Before study entry all study participants are comprehensively informed about the project and a written  
40 declaration of consent for participation is obtained. Access to the new form of care is open to all  
41 patients, regardless of their particular statutory health insurance company. There are no additional  
42 costs or disadvantages for the participating patients. Patients' participation is voluntary. Participants  
43 will be informed in writing and verbally about the nature and scope of the planned procedure before  
44 the start of the study. Given informed consent, including the processing of patients' data, documented  
45 by signing the consent form, can be withdrawn at any time and without giving reasons. Disclosure takes  
46 place in pseudonymized form for the purpose of analysis. The names of the participating patients and  
47 all other confidential information are subject to medical confidentiality and the provisions of the EU  
48 Data Protection Regulation of 25<sup>th</sup> May 2018.  
49  
50  
51  
52  
53  
54

55 A comprehensive data protection concept with a data set prescription of the routine data was  
56 developed for the handling, transfer, and analysis of all data within the project. Contracts of data  
57 protection and for order processing were concluded with the partners. The partners are guided by the  
58  
59  
60



1  
2  
3 applicable standard for research projects and by the applicable data protection regulations. An  
4 approval according to §75 SGB 5 for the transfer of social data for research was obtained from the AOK  
5 Baden-Wuerttemberg.  
6  
7

8  
9 The results of the study will be presented to academic audiences through publication in peer-  
10 reviewed journals and presentations at national and international conferences. The results will also  
11 be disseminated in the community. The study is being conducted in collaboration with a health  
12 insurance company. The process evaluation will also include the identification of significant barriers  
13 and facilitating factors for implementation. If the evaluation of the project is successful, a transfer  
14 into standard care is planned.  
15  
16  
17  
18  
19  
20

### 21 **Authors' contributions**

22  
23 SJ, CM, JV and RS conceptualized the design of the trial and interventions. All authors except PM, JF,  
24 KT are involved in the final elaboration of the intervention components. PM conducted the sample  
25 size calculation and contributed to the section on statistical methods. JV, DF and SJ wrote the first  
26 draft of this article. RS, CM, PM, NK, MH, JF, KK, HB, BG and KT critically revised it. JF contributed to  
27 the section on the health economic evaluation. All authors read and approved the final version of the  
28 manuscript.  
29  
30  
31  
32  
33  
34

### 35 **Collaborators**

36  
37 The CCC-Integrativ study group (in alphabetical order):  
38  
39

40 A. Schmitt, B. Kröger, B. Noack, B. Wattenberg, E. Kaschdailewitsch, H. Mauch, K. Gauß, K. Harder, L.  
41 Lohmüller, Institute for General Practice and Interprofessional Care, University Hospital and Faculty  
42 of Medicine Tuebingen, Germany; A. Seckinger, D. Zips, K. Müller, Comprehensive Cancer Center  
43 Tübingen-Stuttgart, Germany; E. Winkler, M. Busacker-Scharpff, M. Hoffmann, M. Krug, M. Reuter, S.  
44 Eismann, Department of Medical Oncology, National Centre for Tumor Diseases, Heidelberg,  
45 Germany; A. Kestler, B. Leicht, C. Nagat, C. Raff, F. Rapp, K. Kraus, W. Kmietschak, Department of  
46 Integrative Medicine, University Hospital and Faculty of Medicine Ulm, Germany; A. Battran, A.  
47 Frohn, B. Held, C. Perinchery, C. Pfister-Jimenéz, Department of Medicine I, Medical Centre  
48 University of Freiburg, Faculty of Medicine, University of Freiburg, Germany; H. Dürsch, J. Bossert, J.  
49 Szecsenyi, M. Wensing, Department of General Practice and Health Services Research, University  
50 Hospital Heidelberg, Germany; A. Kaltenbach, U. Boltenhagen, Department of Nursing Science,  
51 Institute for Health Sciences, University Hospital and Faculty of Medicine Tuebingen, Germany; A.  
52 Behzad, A. Leppert. B. Stein, Department of Internal Medicine, Division of Pneumology, Paracelsus  
53  
54  
55  
56  
57  
58  
59  
60

1  
2  
3 Medical University, Klinikum Nuernberg, Germany; B. Broge, C. Witte, aQua Institute for Applied  
4 Quality Improvement and Research in Health Care, Goettingen, Germany; S. Treffert, AOK Baden-  
5 Württemberg  
6  
7  
8  
9

### 10 **Funding statement**

11  
12 This work was supported by the Innovationsfonds of the Federal Joint Committee 2019-2022 Grant  
13 number: 01NVF18004  
14  
15

### 16 **Competing interests statement.**

17  
18 The authors JV, DF, RS, CM, PM, NK, MH, JF, KK, HB, BG and KT and SF declare that they do not have  
19 any competing interests.  
20  
21  
22  
23  
24  
25  
26  
27  
28  
29  
30  
31  
32  
33  
34  
35  
36  
37  
38  
39  
40  
41  
42  
43  
44  
45  
46  
47  
48  
49  
50  
51  
52  
53  
54  
55  
56  
57  
58  
59  
60

## References

1. Horneber M, Bueschel G, Dennert G, et al. How many cancer patients use complementary and alternative medicine: a systematic review and metaanalysis. *Integr Cancer Ther* 2012;11(3):187-203. doi: 10.1177/1534735411423920 [published Online First: 2011/10/25]
2. Boon HS, Olatunde F, Zick SM. Trends in complementary/alternative medicine use by breast cancer survivors: comparing survey data from 1998 and 2005. *BMC Womens Health* 2007;7:4. doi: 10.1186/1472-6874-7-4 [published Online First: 2007/04/03]
3. Leitlinienprogramm Onkologie der Arbeitsgemeinschaft der Wissenschaftlichen Medizinischen Fachgesellschaften e.V. (AWMF) DKeVDuDKD. Konsultationsfassung S3-Leitlinie Komplementärmedizin in der Behandlung von onkologischen PatientInnen, 2020.
4. Greenlee H, DuPont-Reyes MJ, Balneaves LG, et al. Clinical practice guidelines on the evidence-based use of integrative therapies during and after breast cancer treatment. *CA Cancer J Clin* 2017;67(3):194-232. doi: 10.3322/caac.21397 [published Online First: 2017/04/25]
5. Lyman GH, Greenlee H, Bohlke K, et al. Integrative Therapies During and After Breast Cancer Treatment: ASCO Endorsement of the SIO Clinical Practice Guideline. *J Clin Oncol* 2018;36(25):2647-55. doi: 10.1200/jco.2018.79.2721 [published Online First: 2018/06/12]
6. Yeh GY, Chan CW, Wayne PM, et al. The Impact of Tai Chi Exercise on Self-Efficacy, Social Support, and Empowerment in Heart Failure: Insights from a Qualitative Sub-Study from a Randomized Controlled Trial. *PLoS One* 2016;11(5):e0154678. doi: 10.1371/journal.pone.0154678 [published Online First: 2016/05/14]
7. Hibbard JH, Mahoney ER, Stockard J, et al. Development and testing of a short form of the patient activation measure. *Health Serv Res* 2005;40(6 Pt 1):1918-30. doi: 10.1111/j.1475-6773.2005.00438.x [published Online First: 2005/12/13]
8. Nagel G, Schreiber D. Patientenkompetenz und Selfempowerment bei Patientinnen mit Brustkrebs im Frühstadium: Ein Modell der Kompetenzberatung. *Deutsche Zeitschrift für Onkologie* 2012;44(04):140-50. doi: 10.1055/s-0032-1314718
9. Schaeffer D, Hurrlemann K, Bauer U, et al. Nationaler Aktionsplan Gesundheitskompetenz. Die Gesundheitskompetenz in Deutschland stärken. Berlin: KomPart 2018.
10. Bravo P, Edwards A, Barr PJ, et al. Conceptualising patient empowerment: a mixed methods study. *BMC Health Serv Res* 2015;15:252:252. doi: 10.1186/s12913-015-0907-z [published Online First: 2015/07/02]
11. Palumbo R. Examining the impacts of health literacy on healthcare costs. An evidence synthesis. *Health Serv Manage Res* 2017;30(4):197-212. doi: 10.1177/0951484817733366 [published Online First: 2017/10/17]
12. Ben-Arye E, Samuels N, Goldstein LH, et al. Potential risks associated with traditional herbal medicine use in cancer care: A study of Middle Eastern oncology health care professionals. *Cancer* 2016;122(4):598-610. doi: 10.1002/cncr.29796 [published Online First: 2015/11/26]
13. Posadzki P, Watson LK, Ernst E. Adverse effects of herbal medicines: an overview of systematic reviews. *Clin Med (Lond)* 2013;13(1):7-12. doi: 10.7861/clinmedicine.13-1-7 [published Online First: 2013/03/12]
14. Johnson SB, Park HS, Gross CP, et al. Complementary Medicine, Refusal of Conventional Cancer Therapy, and Survival Among Patients With Curable Cancers. *JAMA Oncology* 2018;4(10):1375-81. doi: 10.1001/jamaoncol.2018.2487
15. Hayward RA, Asch SM, Hogan MM, et al. Sins of omission: getting too little medical care may be the greatest threat to patient safety. *J Gen Intern Med* 2005;20(8):686-91. doi: 10.1111/j.1525-1497.2005.0152.x [published Online First: 2005/07/30]
16. Wardle JL, Adams J. Indirect and non-health risks associated with complementary and alternative medicine use: An integrative review. *European Journal of Integrative Medicine* 2014;6(4):409-22. doi: <https://doi.org/10.1016/j.eujim.2014.01.001>
17. Davis EL, Oh B, Butow PN, et al. Cancer patient disclosure and patient-doctor communication of complementary and alternative medicine use: a systematic review. *Oncologist*

- 2012;17(11):1475-81. doi: 10.1634/theoncologist.2012-0223 [published Online First: 2012/08/31]
18. Sanford NN, Sher DJ, Ahn C, et al. Prevalence and Nondisclosure of Complementary and Alternative Medicine Use in Patients With Cancer and Cancer Survivors in the United States. *JAMA Oncology* 2019;5(5):735-37. doi: 10.1001/jamaoncol.2019.0349
  19. Arslan C, Guler M. Alternative medicine usage among solid tumour patients receiving chemotherapy. *Eur J Cancer Care (Engl)* 2017;26(5) doi: 10.1111/ecc.12530 [published Online First: 2016/06/22]
  20. Hübner J. Chemotherapie. In: Hübner J, ed. *Onkologie Interdisziplinär*. Stuttgart: Schatauer 2014:54-61.
  21. Shalom-Sharabi I, Samuels N, Lev E, et al. Impact of a complementary/integrative medicine program on the need for supportive cancer care-related medications. *Support Care Cancer* 2017;25(10):3181-90. doi: 10.1007/s00520-017-3726-4 [published Online First: 2017/04/24]
  22. Coolbrandt A, Wildiers H, Aertgeerts B, et al. Characteristics and effectiveness of complex nursing interventions aimed at reducing symptom burden in adult patients treated with chemotherapy: a systematic review of randomized controlled trials. *Int J Nurs Stud* 2014;51(3):495-510. doi: 10.1016/j.ijnurstu.2013.08.008 [published Online First: 2013/10/01]
  23. D'Egidio V, Sestili C, Mancino M, et al. Counseling interventions delivered in women with breast cancer to improve health-related quality of life: a systematic review. *Qual Life Res* 2017;26(10)(10):2573-92. doi: 10.1007/s11136-017-1613-6 [published Online First: 2017/06/18]
  24. Chambers SK, Hyde MK, Smith DP, et al. New Challenges in Psycho-Oncology Research III: A systematic review of psychological interventions for prostate cancer survivors and their partners: clinical and research implications. *Psycho-oncology* 2017;26(7):873-913. doi: 10.1002/pon.4431 [published Online First: 2017/07/12]
  25. Kreienberg R, Albert U, Follmann M, et al. *Interdisziplinäre S3-Leitlinie für Diagnostik, Therapie und Nachsorge des Mammakarzinoms, 2012:1-104*.
  26. Lederle M, Weltzien D, Bitzer EM. Führt die Steigerung von Gesundheitskompetenz und Selbstmanagement zu einer angemesseneren Inanspruchnahme gesundheitlicher Leistungen? *Gesundheitswesen* 2017;79(08/09)(08/09):656-804.
  27. Klein GE, Guethlin C. Information and Training Needs Regarding Complementary and Alternative Medicine: A Cross-sectional Study of Cancer Care Providers in Germany. *Integr Cancer Ther* 2018;17(2):380-87. doi: 10.1177/1534735416666372 [published Online First: 2016/09/03]
  28. Blödt S, Mittring N, Schützler L, et al. A consultation training program for physicians for communication about complementary medicine with breast cancer patients: a prospective, multi-center, cluster-randomized, mixed-method pilot study. *BMC Cancer* 2016;16(1):843. doi: 10.1186/s12885-016-2884-y [published Online First: 2016/11/05]
  29. Klafke N, Mahler C, von Hagens C, et al. A complex nursing intervention of complementary and alternative medicine (CAM) to increase quality of life in patients with breast and gynecologic cancer undergoing chemotherapy (CONGO study): study protocol for a partially randomized patient preference trial. *Trials* 2015;16(51):51. doi: 10.1186/s13063-014-0538-4 [published Online First: 2015/04/19]
  30. Self-efficacy in women experiencing Complementary and Alternative Medicine in CONGO-study. International Council of Nursing (ICN) Congress; 2017; Barcelona, Spain.
  31. National Research Center in Complementary and Alternative Medicine (NAFKAM) UTAUoN. <https://cam-cancer.org/en>: National Research Center in Complementary and Alternative Medicine (NAFKAM), UiT The Arctic University of Norway; 2021 [accessed 11.06. 2021].
  32. Orchard C, Bursey, S., Peterson, L., Verrilli, S. Can Workshops Provide a Way to Enhance Patient/Client Centered Collaborative Teams?: Evidence of Outcomes from TEAMc Online Facilitator Training and Team Workshops?: Evidence of Outcomes from TEAMc Online Facilitator Training and Team Workshops. *International Journal of Practice-based Learning in Health and Social Care* 2016;4 No 2:73-87.
  33. Orchard C. <https://teamc.ca> 2007 [accessed 22.05. 2021].

- 1  
2  
3 34. Brenk-Franz K, Hibbard JH, Herrmann WJ, et al. Validation of the German version of the patient  
4 activation measure 13 (PAM13-D) in an international multicentre study of primary care  
5 patients. *PLoS One* 2013;8(9):e74786. doi: 10.1371/journal.pone.0074786 [published Online  
6 First: 2013/10/08]  
7  
8 35. Zill JM, Dwinger S, Kriston L, et al. Psychometric evaluation of the German version of the Patient  
9 Activation Measure (PAM13). *BMC Public Health* 2013;13:1027. doi: 10.1186/1471-2458-13-  
10 1027 [published Online First: 2013/11/01]  
11  
12 36. Jansen F, Coupé VMH, Eerenstein SEJ, et al. Costs from a healthcare and societal perspective among  
13 cancer patients after total laryngectomy: are they related to patient activation? *Support Care*  
14 *Cancer* 2018;26(4):1221-31. doi: 10.1007/s00520-017-3945-8 [published Online First:  
15 2017/11/04]  
16  
17 37. Rademakers J, Maindal HT, Steinsbekk A, et al. Patient activation in Europe: an international  
18 comparison of psychometric properties and patients' scores on the short form Patient  
19 Activation Measure (PAM-13). *BMC Health Serv Res* 2016;16(1):570. doi: 10.1186/s12913-016-  
20 1828-1 [published Online First: 2016/10/13]  
21  
22 38. Bates JS, Auten J, Sketch MR, et al. Patient engagement in first cycle comprehensive chemotherapy  
23 consultation pharmacist services and impact on patient activation. *J Oncol Pharm Pract*  
24 2019;25(4):896-902. doi: 10.1177/1078155219832644 [published Online First: 2019/02/28]  
25  
26 39. Harris PA, Taylor R, Thielke R, et al. Research electronic data capture (REDCap)—A metadata-driven  
27 methodology and workflow process for providing translational research informatics support.  
28 *Journal of Biomedical Informatics* 2009;42(2):377-81. doi:  
29 <https://doi.org/10.1016/j.jbi.2008.08.010>  
30  
31 40. Kirk MA, Kelley C, Yankey N, et al. A systematic review of the use of the Consolidated Framework  
32 for Implementation Research. *Implement Sci* 2016;11:72. doi: 10.1186/s13012-016-0437-z  
33 [published Online First: 2016/05/18]  
34  
35 41. Weiss FD, Mewes R, Rief W, et al. HCU-Q: Entwicklung eines Fragebogens zur Erfassung der  
36 Inanspruchnahme medizinischer Gesundheitsleistungen. *Verhaltenstherapie* 2018;28(1):15-  
37 24. doi: 10.1159/000478028  
38  
39  
40  
41  
42  
43  
44  
45  
46  
47  
48  
49  
50  
51  
52  
53  
54  
55  
56  
57  
58  
59  
60

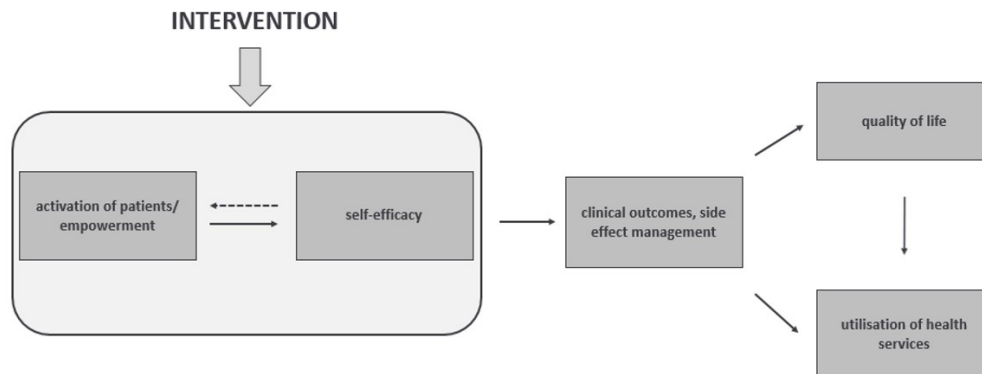

20 Fig. 1 Theoretical model for outcomes on patient level

21 308x122mm (95 x 95 DPI)

1  
2  
3  
4  
5  
6  
7  
8  
9  
10  
11  
12  
13  
14  
15  
16  
17  
18  
19  
20  
21  
22  
23  
24  
25  
26  
27  
28  
29  
30  
31  
32  
33  
34  
35  
36  
37  
38  
39  
40  
41  
42  
43  
44  
45  
46  
47  
48  
49  
50  
51  
52  
53  
54  
55  
56  
57  
58  
59  
60

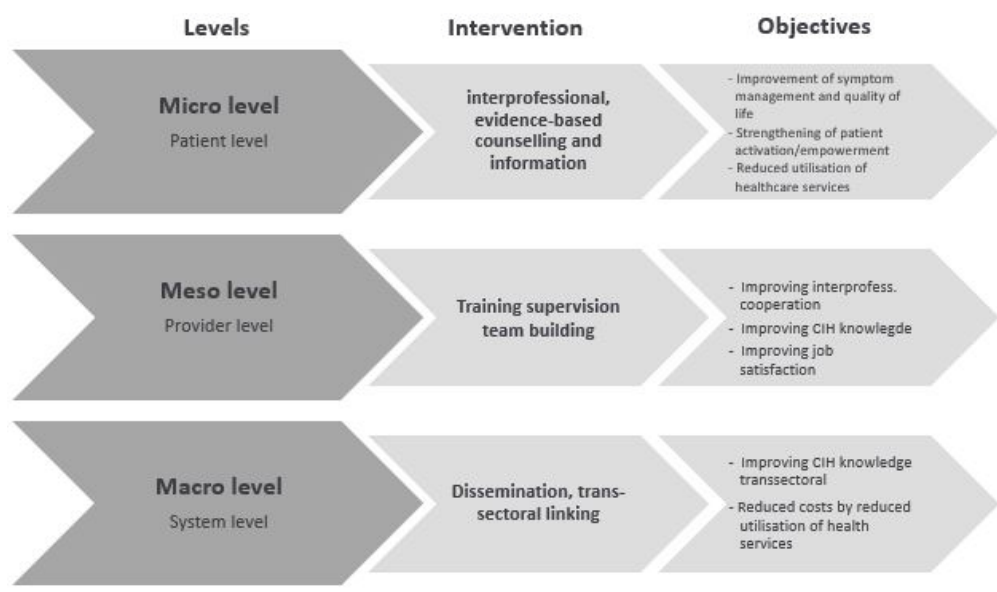

Fig. 2 Outcomes framework for CCC-Integrativ

165x97mm (96 x 96 DPI)

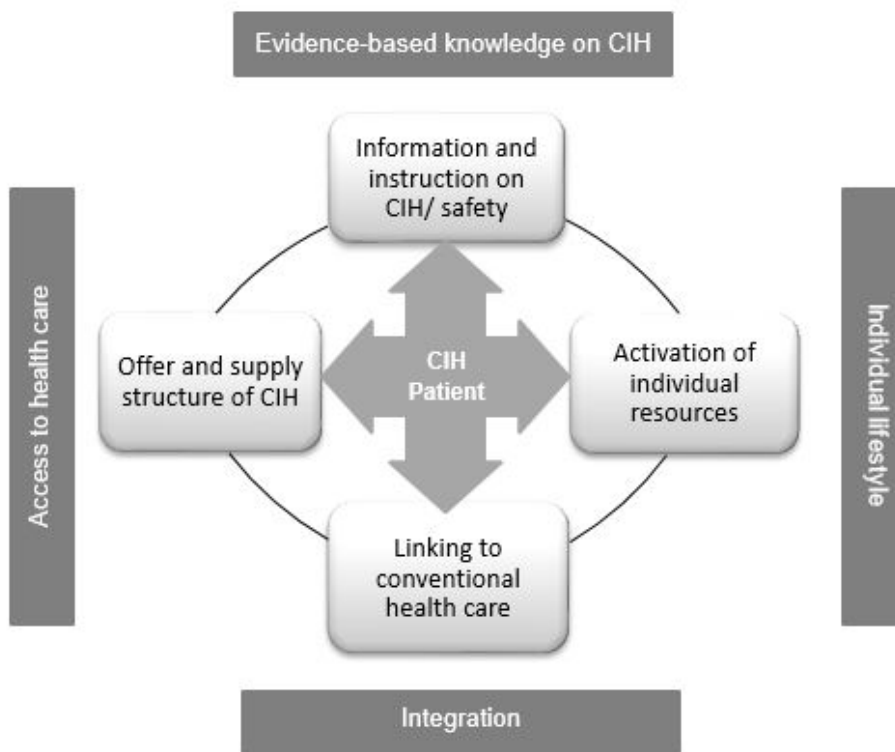

Fig. 3 CCC-integrative counselling model of the intervention

137x114mm (96 x 96 DPI)



1  
2  
3  
4  
5  
6  
7  
8  
9  
10  
11  
12  
13  
14  
15  
16  
17  
18  
19  
20  
21  
22  
23  
24  
25  
26  
27  
28  
29  
30  
31  
32  
33  
34  
35  
36  
37  
38  
39  
40  
41  
42  
43  
44  
45  
46  
47  
48  
49  
50  
51  
52  
53  
54  
55  
56  
57  
58  
59  
60

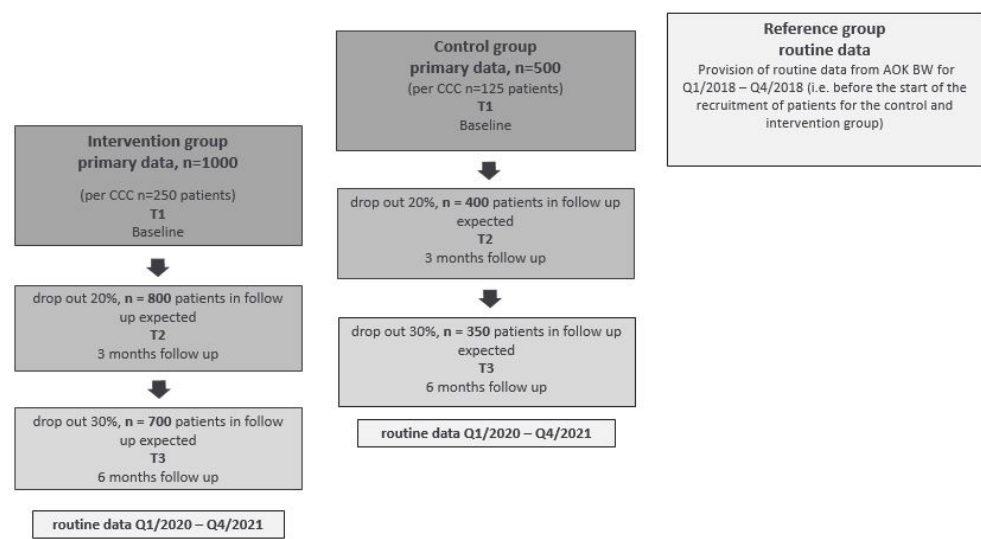

Fig. 4 Flowchart data collection (T1-T3)/ routine data

223x121mm (96 x 96 DPI)

# BMJ Open

## Interprofessional evidence-based counselling programme for Complementary and Integrative Health Care in cancer patients – study protocol for the controlled implementation study CCC - Integrativ

|                                 |                                                                                                                                                                                                                                                                                                                                                                                                                                                                                                                                                                                                                                                                                                                                                                                                                                                                                                                                                                                                                                                                                                                                                                                                                                                                                                                                                                                                                                         |
|---------------------------------|-----------------------------------------------------------------------------------------------------------------------------------------------------------------------------------------------------------------------------------------------------------------------------------------------------------------------------------------------------------------------------------------------------------------------------------------------------------------------------------------------------------------------------------------------------------------------------------------------------------------------------------------------------------------------------------------------------------------------------------------------------------------------------------------------------------------------------------------------------------------------------------------------------------------------------------------------------------------------------------------------------------------------------------------------------------------------------------------------------------------------------------------------------------------------------------------------------------------------------------------------------------------------------------------------------------------------------------------------------------------------------------------------------------------------------------------|
| Journal:                        | <i>BMJ Open</i>                                                                                                                                                                                                                                                                                                                                                                                                                                                                                                                                                                                                                                                                                                                                                                                                                                                                                                                                                                                                                                                                                                                                                                                                                                                                                                                                                                                                                         |
| Manuscript ID                   | bmjopen-2021-055076.R1                                                                                                                                                                                                                                                                                                                                                                                                                                                                                                                                                                                                                                                                                                                                                                                                                                                                                                                                                                                                                                                                                                                                                                                                                                                                                                                                                                                                                  |
| Article Type:                   | Protocol                                                                                                                                                                                                                                                                                                                                                                                                                                                                                                                                                                                                                                                                                                                                                                                                                                                                                                                                                                                                                                                                                                                                                                                                                                                                                                                                                                                                                                |
| Date Submitted by the Author:   | 29-Oct-2021                                                                                                                                                                                                                                                                                                                                                                                                                                                                                                                                                                                                                                                                                                                                                                                                                                                                                                                                                                                                                                                                                                                                                                                                                                                                                                                                                                                                                             |
| Complete List of Authors:       | Valentini, Jan; Universitätsklinikum Tübingen, Institute for General Practice and Interprofessional Care<br>Fröhlich, Daniela; Universitätsklinikum Tübingen, Institute for General Practice and Interprofessional Care<br>Stolz, Regina; Universitätsklinikum Tübingen, Institute for General Practice and Interprofessional Care<br>Mahler, Cornelia; Universitätsklinikum Tübingen, Institute for Health Sciences, Department of Nursing Science<br>Martus, Peter; University Hospital Tübingen, Institute for Clinical Epidemiology and Applied Biostatistics<br>Klafke, Nadja; University Hospital Heidelberg, Department of General Practice and Health Services Reseach<br>Horneber, Markus; Klinikum Nurnberg, Department of Internal Medicine, Division of Pneumology, Paracelsus Medical University<br>Frasch, Jona; aQua Institute for Applied Quality Improvement and Research in Health Care<br>Kramer, Klaus; University Hospital and Faculty of Medicine Ulm, Department of Integrative Medicine<br>Bertz, Hartmut; Medical Center-University of Freiburg, Department of Medicine I, Faculty of Medicine<br>Grün, Barbara; National Centre for Tumor Diseases Heidelberg, Department of Medical Oncology<br>Tomaschko-Ubeländer, Katrin; AOK Baden-Württemberg, Fachbereich Integriertes Leistungsmanagement<br>Joos, Stefanie; Universitätsklinikum Tübingen, Institute for General Practice and Interprofessional Care |
| <b>Primary Subject Heading</b>: | Complementary medicine                                                                                                                                                                                                                                                                                                                                                                                                                                                                                                                                                                                                                                                                                                                                                                                                                                                                                                                                                                                                                                                                                                                                                                                                                                                                                                                                                                                                                  |
| Secondary Subject Heading:      | Oncology, Communication, Complementary medicine, Nursing, Patient-centred medicine                                                                                                                                                                                                                                                                                                                                                                                                                                                                                                                                                                                                                                                                                                                                                                                                                                                                                                                                                                                                                                                                                                                                                                                                                                                                                                                                                      |
| Keywords:                       | ONCOLOGY, COMPLEMENTARY MEDICINE, Nutritional support < ONCOLOGY, PREVENTIVE MEDICINE, Herbal medicine < THERAPEUTICS, Adult oncology < ONCOLOGY                                                                                                                                                                                                                                                                                                                                                                                                                                                                                                                                                                                                                                                                                                                                                                                                                                                                                                                                                                                                                                                                                                                                                                                                                                                                                        |
|                                 |                                                                                                                                                                                                                                                                                                                                                                                                                                                                                                                                                                                                                                                                                                                                                                                                                                                                                                                                                                                                                                                                                                                                                                                                                                                                                                                                                                                                                                         |

1  
2  
3  
4  
5  
6  
7  
8  
9  
10  
11  
12  
13  
14  
15  
16  
17  
18  
19  
20  
21  
22  
23  
24  
25  
26  
27  
28  
29  
30  
31  
32  
33  
34  
35  
36  
37  
38  
39  
40  
41  
42  
43  
44  
45  
46  
47  
48  
49  
50  
51  
52  
53  
54  
55  
56  
57  
58  
59  
60

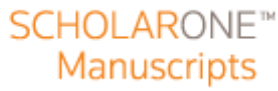

# Interprofessional evidence-based counselling programme for Complementary and Integrative Health Care in cancer patients—study protocol for the controlled implementation study CCC - Integrativ

---

Jan Valentini<sup>1</sup>, Daniela Fröhlich<sup>1</sup>, Regina Stolz<sup>1</sup>, Cornelia Mahler<sup>2</sup>, Peter Martus<sup>3</sup>, Nadja Klafke<sup>4</sup>, Markus Horneber<sup>5</sup>, Jona Frasch<sup>6</sup>, Klaus Kramer<sup>7</sup>, Hartmut Bertz<sup>8</sup>, Barbara Grün<sup>9</sup>, Katrin Tomaschko<sup>10</sup>, Stefanie Joos<sup>1</sup> On behalf of the CCC-Integrativ study group

<sup>1</sup>Institute for General Practice and Interprofessional Care, University Hospital and Faculty of Medicine Tuebingen, Tuebingen, Germany

<sup>2</sup>Department of Nursing Science, Institute for Health Sciences, University Hospital and Faculty of Medicine Tuebingen, Tuebingen, Germany

<sup>3</sup>Institute for Clinical Epidemiology and Applied Biostatistics, University Hospital and Faculty of Medicine Tuebingen, Tuebingen, Germany

<sup>4</sup>Department of General Practice and Health Services Research, University Hospital Heidelberg, Marsilius-Arkaden, Turm West, Im Neuenheimer Feld 130.3, 69120 Heidelberg, Germany

<sup>5</sup>Department of Internal Medicine, Division of Pneumology, Paracelsus Medical University, Klinikum Nuernberg, Germany

<sup>6</sup>aQua Institute for Applied Quality Improvement and Research in Health Care, 37073 Goettingen, Germany

<sup>7</sup>Department of Integrative Medicine, University Hospital and Faculty of Medicine Ulm, Germany

<sup>8</sup>Department of Medicine I, Medical Centre University of Freiburg, Faculty of Medicine, University of Freiburg, Germany

<sup>9</sup>Department of Medical Oncology, National Centre for Tumor Diseases, Heidelberg, Germany

<sup>10</sup>AOK Baden-Württemberg Hauptverwaltung, Fachbereich Integriertes Leistungsmanagement, Presselstraße 19, 70191 Stuttgart, Germany

jan.valentini@med.uni-tuebingen.de

daniela.froehlich2@med.uni-tuebingen.de

Regina.Stolz@med.uni-tuebingen.de

Cornelia.Mahler@med.uni-tuebingen.de

Peter.Martus@med.uni-tuebingen.de

Nadja.Klafke@med.uni-heidelberg.de

markus.horneber@klinikum-nuernberg.de

jona.frasch@aqua-institut.de

klaus.kramer@uniklinik-ulm.de

hartmut.bertz@uniklinik-freiburg.de

barbara.gruen@med.uni-heidelberg.de

Katrin.Tomaschko@bw.aok.de

Stefanie.Joos@med.uni-tuebingen.de

Correspondence to Dr Jan Valentini; jan.valentini@med.uni-tuebingen.de

## Abstract

### Introduction

According to international literature, cancer patients wish to have information on complementary and integrative health care (CIH). Medical guidelines recommend actively approaching cancer patients discussing potential benefits and risks of individual CIH methods. While some CIH methods, e.g. acupuncture and yoga, have been proven effective in high-quality studies, other CIH methods lack studies or bear the risk of interactions with chemotherapeutics, e.g. herbal drugs. Therefore, an evidence-based interprofessional counselling programme on CIH will be implemented at four Comprehensive Cancer Centres (CCC) in the federal state of Baden-Wuerttemberg, Germany.

### Methods and analysis

A complex intervention consisting of elements on patient, provider and system levels will be developed and evaluated within a multilayer evaluation design with confirmatory evaluation on patient level. Patients with a cancer diagnosis within the last 6 months will receive 3 individual counselling sessions on CIH within 3 months (=intervention on patient level). The counselling will be provided by an interprofessional team of medical and nursing staff. For this purpose, an intensive online training programme, a CIH knowledge database and an interprofessional team-building process were developed and implemented (=intervention on provider level). Moreover, training events on the basics of CIH are offered in the outpatient setting (=intervention on system level). Primary outcome of the evaluation at the patient level is patient activation measured with the PAM-13 after 3 months. Secondary outcomes, e.g. quality of life, self-efficacy and clinical parameters, will be assessed at baseline, after 3 months and at 6 months follow-up. The intervention group (n=1000) will be compared with a control group (n=500, treatment as usual, no CIH counselling). The outcomes and follow-up times in the control group are the same as in the intervention group. Moreover, the use of health services will be analysed in both groups using routine data. A qualitative-quantitative process evaluation as well as a health economic evaluation will identify relevant barriers and enabling factors for later roll-out.

### Ethics and dissemination.

The study has been approved by the appropriate Institutional Ethical Committee of the University of Tuebingen, No. 658/2019BO1. The results of these studies will be disseminated to academic audiences and in the community.

### Registration

German Clinical Trials Register (DRKS), DRKS00021779 registered on 12<sup>th</sup> June 2020

### Keywords

1  
2  
3 Oncology, comprehensive cancer centre, complementary medicine and integrative health care,  
4 Interprofessional, integrative medicine, supportive therapy, counselling intervention, patient  
5 activation, controlled study  
6  
7  
8  
9  
10  
11  
12  
13  
14  
15  
16  
17  
18  
19  
20  
21  
22  
23  
24  
25  
26  
27  
28  
29  
30  
31  
32  
33  
34  
35  
36  
37  
38  
39  
40  
41  
42  
43  
44  
45  
46  
47  
48  
49  
50  
51  
52  
53  
54  
55  
56  
57  
58  
59  
60

For peer review only

## Strengths and limitations of this study

- For the first time, a transsectoral, interprofessional, evidence-based counselling programme for Complementary and Integrative Health Care will be implemented at Comprehensive Cancer Centres Baden-Wuerttemberg, Germany.
- The complex evaluation will be conducted at the patient, provider, and system levels within a controlled design.
- The guiding (confirmatory) hypothesis is at the patient level measured by patient activation (PAM-13).
- Randomization at the patient level is not possible due to the naturalistic study design.
- On the provider level, a training programme for the counselling team is designed and evaluated as blended-learning programme with online (asynchronous) and onsite (synchronous) formats.

## Introduction

According to previous international studies, there is a high use of naturopathic/complementary approaches (CIH= complementary and integrative health care) among cancer patients. A meta-analysis shows that about 40% of all oncology patients use CIH<sup>1</sup>; for patients with breast cancer, up to 80% can be assumed<sup>2</sup>. For some CIH methods, positive effects in cancer patients have been shown in RCTs and meta-analyses, e.g. meditation, particularly mindfulness-based stress reduction for mood disturbance and depression, Yoga and Tai Ji for improving quality of life and fatigue, acupuncture and acupressure to reduce nausea and pain, individual phytotherapeutics and herbal medicines such as ginger for nausea<sup>3-5</sup>. In addition, many of these CIHs have the potential to empower and activate patients as well as improve self-efficacy<sup>6</sup>. The promotion of patient activation<sup>7</sup>, self-management strategies<sup>8</sup>, and health literacy<sup>9</sup> have been shown to empower patients with cancer<sup>10</sup> and contribute to reducing the use of health services<sup>11</sup>. Thereby, patient activation is considered as an overarching concept including knowledge, skill and confidence for self-management in chronic diseases<sup>12</sup>.

However, CIH also entails clinical risks; e.g. phytotherapeutics and micronutrients, especially in high doses (vitamins, selenium), can interact with chemotherapy<sup>13,14</sup>. A further risk arises as patients often seek help outside conventional health care structures (e.g. alternative practitioners) with unforeseeable health consequences such as delayed diagnosis and failure to provide indicated treatments<sup>15,16</sup>. In addition, there are risks for economic harm as the majority of costs for CIH procedures are not covered by public insurance<sup>17</sup>. Between 20 and 77% of cancer patients do not inform their treating physicians when using CIH<sup>18-20</sup>. This lack of communication may endanger the doctor-patient relationship and contribute to the discontinuation of conventional therapy<sup>15,21,22</sup>.

Patient-centred care for cancer includes supportive measures that enable patients to cope as well as possible with their diagnosis and therapy, including its side effects<sup>23-25</sup>. These supportive measures may also include CIH methods. Therefore, according to current German S3 guidelines on breast cancer, cervical cancer, ovarian cancer, as well as the guidelines on complementary medicine in the treatment of oncology patients<sup>3</sup>, palliative medicine and psycho-oncology, there is a consensus recommendation that all patients should be asked about their need for information on their use of CIH procedures<sup>3,26</sup>. However, this recommendation contrasts with a lack of human resources in oncologic clinics and insufficient CIH knowledge among medical and nursing staff. Therefore, this recommendation cannot be implemented properly in everyday care, and the topic of CIH is often not sufficiently or not at all addressed in patient communication. The aim of the CCC-Integrativ study is to develop and evaluate a complex intervention as defined by elements on patient, provider and system levels to improve CIH for cancer patients. In detail, we aim to evaluate whether interprofessional counselling about CIH improves patient activation and patients' confidence in contributing to their health.



## Methods and analysis

### Theoretical framework and objectives

The project pursues a health services research approach, and therefore, objectives and interventions will be differentiated in relation to the patient-, provider- and system-level or -seen from a health services research perspective- in relation to micro-, meso- and macro-level.

On the **patient (micro)-level**, the project aims to activate patients and promote their self-efficacy (see Fig.1). It is expected that by enhanced empowerment, the patient's quality of life and clinical outcomes will be improved, which can, in turn, lead to reduced use of health services in the further course <sup>27</sup>.

Please insert Fig 1 here

Objectives at the **provider (meso)-level** are an improvement of knowledge and communication skills regarding CIH as well as improved job satisfaction and interprofessional collaboration between doctors and nurses within the care setting.

At the system (**macro)-level**, the objectives include cost reduction and a transsectoral increase in knowledge of CIH (see Fig.2).

Please insert Fig 2 here

### Setting and Study design

Within the CCC-Integrativ study, an evidence-based interprofessional counselling programme on CIH for oncology patients will be implemented and evaluated at the four Comprehensive Cancer Centres (CCC) (Freiburg, Heidelberg, Tuebingen-Stuttgart, Ulm) in Baden-Wuerttemberg. Comprehensive Cancer Centres are implemented at most university hospitals in Germany to ensure a high standard of medical care for oncology patients and are considered centres of excellence in oncology.

As described above, CCC-Integrativ will be evaluated at patient, provider and system levels, whereby the confirmatory testing will be on patient level. The accompanying process evaluation, which also analyses aspects of the micro-, meso- and macro- level, is presented in detail in a separate protocol.

The total study duration is 36 months. For the individual study participant, the study lasts 6 months, including the follow-up survey (intervention group and control group). The preparation period runs from months 1-6, the primary data collection in the control group from months 7 to 18 (recruitment months 7-9). Data collection in the intervention group from months 13-30 (recruitment months 13-24).

1  
2  
3 The intervention group is compared with a control group and a reference group. The control group is  
4 recruited 6 months before the start of the intervention phase. Identical outcome parameters are  
5 collected. The reference group results from claims data of the statutory health insurance of the  
6 Allgemeine Ortskrankenkasse Baden-Wuerttemberg (AOK BW) without additional primary data  
7 collection. The reference group allows us to examine the representativity of the study population  
8 compared to the target population (members of AOK-BW). If differences between the control group  
9 and the reference group are detected, i.e. study effects are present, these will be accounted for in the  
10 comparison of the reference group with the intervention group to disentangle study effects and  
11 intervention effects.  
12  
13  
14  
15  
16  
17  
18

19 A classical parallel-group design with randomization at the patient level did not seem feasible, as  
20 previous studies have shown that patients with high use of or need for counselling on CIH cannot be  
21 randomized<sup>24</sup>. Also, cluster randomization had to be rejected due to possible contamination problems.  
22 Given that all four participating CCCs are located in the same federal state (Baden-Wuerttemberg,  
23 Germany) and thus within a few hours' drive, we could not exclude that patients treated in one CCC  
24 would seek counselling in another participating CCC. Thus, we decided to choose different time  
25 intervals within the study period for control and intervention patients.  
26  
27  
28  
29  
30  
31  
32  
33

### 34 **Intervention on patient level**

35  
36 The intervention consists of an interprofessional, evidence-based counselling service for patients with  
37 counselling needs in the field of CIH. Key points of the counselling are information giving and guidance  
38 for health needs in the context of CIH to increase patient activation and self-efficacy.  
39  
40  
41

42 The counselling concept takes into account the patient's resources, integrates conventional health  
43 care (as provided by the CCCs in routine care) and provides information on CIH and care services with  
44 CIH. The central point of the counselling is the specific CIH counselling needs of the patient (see Fig.  
45 3). In addition to the specific patient needs, nutrition, exercise and stress management are addressed  
46 as resources. If there is a need for further counselling on these three topics or CIH counselling sessions  
47 were to bring up psychological distress for any patients, referrals are made to the specific counselling  
48 services for nutrition, exercise and psycho-oncology offered in all participating CCCs.  
49  
50  
51  
52

53 The CIH counselling service is provided by interprofessional teams consisting of specially trained  
54 physicians and nurses at each of the four participating CCCs and is integrated into the existing  
55 structures at the four participating CCCs in Freiburg, Heidelberg, Tuebingen-Stuttgart und Ulm. Our  
56 concept for counselling follows an evidence-based approach, integrating patient preferences and  
57 individual medical and nursing expertise.  
58  
59  
60

## **Intervention and control group**

### Intervention group

Patients of the intervention group will be offered interprofessional individual counselling. Eligible patients will receive at least three counselling sessions on evidence-based nursing and/or medical interventions within three months. The first counselling session will be face-to-face and interprofessional and is planned for a duration of 60 minutes. The subsequent two counselling sessions may be mono-professional and performed by telephone or as video counselling with a duration of approximately 30 minutes.

Please insert Fig 3 here

If required within a counselling session, easy to understand information leaflets developed in the preparation phase for the most relevant symptoms and CIH methods and/or prescriptions for phytotherapeutics are handed out to patients to promote patient activation. In case of recommendation of external applications, these can also be shown to the patient on-site. Furthermore, counselling on where to find trustworthy information about CIH on the internet as well as how to evaluate CIH providers and CIH products will be provided.

To standardize the counselling process, a structured guideline for the consulting teams is developed before the intervention starts and will be practised in the training programme.

### Control Group and reference group

The control group and the reference group receive conventional health care as usual provided by the CCCs (treatment as usual).

## **Participants**

Eligible participants consist of outpatient oncology patients at the four Comprehensive Cancer Centres (Tuebingen-Stuttgart, Ulm, Freiburg and Heidelberg) of the Federal State of Baden-Wuerttemberg, Germany).

## **In- and exclusion criteria**

The following inclusion criteria apply to the intervention group and the control group:

- Diagnosis of cancer incl. progression or recurrence within the last 6 months (all cancer types can be included).
- The patient must be able to attend counselling on site.

- Treatment at one of the participating CCCs or consultation for a second opinion
- Age  $\geq 18$  years
- Need for CIH counselling (attested by actively contacting the local counselling centre by email, phone or in-person).
- A present signed declaration of consent to the study and to data protection (Informed consent).

Exclusion criteria:

- For intervention group: participation in the control group
- Language or cognitive impairments preventing patients from completing questionnaires independently

## Recruitment

### Recruitment procedure in the intervention group:

Information materials on the project (as flyers, brochures, and a website) are displayed in outpatient clinics, day clinics and the other counselling centres at the four CCCs. In addition, the project will be presented at other counselling services, support groups and established formats (senior physician conferences, nursing service meetings, etc.) in each CCC. In the preparatory phase, information events will also be held at each CCC to report on the project. Patients are to become aware of the counselling via flyers, newspaper reports, word-of-mouth information, via the treating physicians and via being actively approached by the study staff.

### Recruitment procedure in the control group:

Patients in the control group are actively approached by study staff (doctors, nurses, study assistants) during waiting times in the rooms of the CCC of the day clinic. The patients are informed about the study and asked whether they would enter the control group. The time points of data collection as well as the instruments used to collect the primary and secondary outcomes correspond to those in the intervention group (T1, T2, T3). Since the counselling service is not yet established, inclusion in the intervention group is not yet possible. As compensation for their time, the patients are offered the CIH counselling service after the end of the observation period of 6 months (outside the study setting).

### Recruitment procedure in the reference group:

As there is no primary data collection in the reference group, no recruitment is needed. Instead, secondary data from the AOK-BW will be used in pseudonymized form.

## **Intervention on provider level**

### **Blended-learning training programmes for counselling teams**

The training programme for counselling teams is designed as blended-learning with online (asynchronous) and onsite (synchronous) formats such as webinars or face-to-face format. The contents of the training program were developed during the preparatory phase of the project based on existing guidelines and expertise from two previous studies: the CONGO study and the project KOKON. Data from KOKON ([www.kompetenznetz-kokon.de](http://www.kompetenznetz-kokon.de)) show the specific information that doctors need for good counselling<sup>28</sup> and how this can be implemented successfully<sup>29</sup>, whereas CONGO focused on nursing applications in the context of supportive cancer care<sup>30 31</sup>. The online content of CCC-Integrativ is presented through an online learning management system (ILIAS-software). Training consists of evidence-based text material, live lectures and asynchronous lectures on individual CIH methods and of communication training. For the latter, training with simulation patients was integrated into the synchronous online formats. The structure and overall contents of the blended-learning training programme will be presented in detail in a separate publication (in preparation).

### **Tool box for counselling teams**

In order to achieve standardized and evidence-based counselling on CIH, specific symptom-driven guidelines for the most relevant symptoms (e.g. on chemotherapy-induced nausea and vomiting) are developed on the basis of structured literature research and expert consensus process. Altogether, 20 symptom-driven guidelines will be developed to provide a basic counselling source of information for the counselling teams.

### **Knowledge database on CIH**

Within the KOKON Project (KOKONbase), a knowledge database on clinical efficacy and safety of complementary medicine in oncology was implemented. The contents of the database are linked to the international information portal of the CAM Cancer Project<sup>32</sup> and include free access via Onkopedia (<https://www.onkopedia.com/de>), the guideline portal of the German Society for Haematology and Medical Oncology. During the CCC-Integrativ Study, the database will be constantly updated and supplemented with content on complementary nursing.

### **Interprofessional team building**

Interprofessional counselling requires interprofessional team building of the counselling teams (nurse and physician). Therefore, workshops to promote interprofessional collaboration using the TEAM<sup>c</sup> approach<sup>33 34</sup> are performed for each counselling team, either onsite or online (synchronous) and complement the blended-learning programme.

## Intervention on system level

As part of the system-level intervention, basic training on CIH is provided to healthcare professionals on a cross-sectoral level, ranging from university hospitals to primary care. The target groups are, e.g. health workers in the CCCs, general practitioners and ambulatory care services. The aim of this training is to achieve a common understanding of the term CIH, discuss possible indications for the application and potential risks of CIH based on scientific literature and to address reliable sources of information on CIH. The number of training sessions and the exact target persons are not fixed in advance but will be determined by the demand of the different groups of healthcare professionals during the intervention phase.

## Primary and secondary outcomes on patient level

### Primary outcome

The primary outcome parameter for assessing the intervention effect is patient activation, operationalized by the Patient Activation Measure questionnaire of the German version (PAM-13-D) after 3 months (T2)<sup>7 35</sup>. The PAM-13 is widely used internationally, also within the oncology setting, and has been validated in German. It has been shown to be a valid and reliable predictor of patient activation<sup>35 36</sup>. The PAM-13 measures the extent to which a patient actively participates in his or her treatment. Furthermore, it measures the patient's active role in managing his/her own health and the extent to which he/she feels competent to fulfil that role. This construct includes aspects of health and patient knowledge, skill, and confidence for self-management and therefore allows us to omit other concept-specific questionnaires, reducing the patient's overall burden of filling out questionnaires. A correlation between a higher level of patient activation (measured by the PAM-13) and better health outcomes, improved treatment adherence and a reduction in healthcare costs has been shown<sup>37</sup>. The PAM-13-D is completed by the patients themselves. In the control and the intervention groups, PAM-13-D will be measured at baseline (T1), after 3 months (T2) and 6 months follow-up (T3) according to table 1.

### Secondary outcomes

One part of the secondary outcomes at patient level is collected via primary data collection; another part is based on routine data. Secondary outcomes via primary data collection include quality of life, self-efficacy, depression, fatigue, symptom management, health literacy and health care utilization. All outcomes will be measured with validated instruments and assessed at baseline (T1), after 3 months (T2) and 6 months follow-up (T3) as described in table 1.

| patients                                     |                                         |       |                |                |                             |
|----------------------------------------------|-----------------------------------------|-------|----------------|----------------|-----------------------------|
| outcomes                                     | instrument                              | items | T1<br>Baseline | T2<br>3 months | T3<br>6 months<br>follow up |
| <u>primary outcome</u><br>patient activation | PAM-13                                  | 13    | x              | x              | x                           |
| <u>secondary outcomes</u>                    |                                         |       |                |                |                             |
| health status                                | EQ 5D                                   | 5     | x              | x              | x                           |
| self-efficacy                                | SES6G                                   | 6     | x              | x              | x                           |
| unmet needs                                  | NEQ                                     | 27    | x              |                |                             |
| quality of life                              | EORTC-QLQ-C30<br>(only question 29 +30) | 2     | x              | x              | x                           |
| depression, agitation                        | PHQ-9                                   | 9     | x              | x              | x                           |
| fatigue                                      | EORTC FA 12                             | 12    | x              | x              | x                           |
| measure yourself concerns and<br>wellbeing   | MYCaW                                   | 7     | x              | x              | x                           |
| symptoms, therapy-assisted                   | MIDOS2                                  | 11    | x              | x              | x                           |
| single item literacy screener                | SILS                                    | 1     | x              |                |                             |
| health care utilization questionnaire        | HCU-Q (adapted)                         | 11    | x              | x              | x                           |
| <u>sociodemographic data</u>                 |                                         | 26    | x              |                |                             |
| <u>medical data</u>                          |                                         | 10    | x              | x              | x                           |

Tab. 1 Primary and secondary outcomes at patient level in the intervention and control group

The following clinical parameters, not shown in Tab. 1, are also collected at patient level (survey dates are given in brackets): diagnosis including TNM classification (T1), date of primary diagnosis of cancer (T1), if applicable, diagnosis of recurrence/progression (T1, T2, T3), ongoing or planned oncological therapies (chemotherapy, surgery etc.) (T1, T2, T3).

Secondary outcomes based on routine data are use of inpatient and outpatient health care services, prescription of drugs, days of incapacity to work.

Routine (=claims) data are collected for billing purposes from the medical insurance company - the Allgemeine Ortskrankenkasse Baden-Wuerttemberg (AOK BW). The AOK BW is the fifth largest health insurance fund in Germany and the largest in Baden-Wuerttemberg, with approximately 4.5 million insured persons. These data come from all AOK BW-insured persons who had received an ICD-10 cancer diagnosis in the relevant time periods.

## Sample size

Consistent data on the distribution of the primary endpoint PAM-13 is found in the literature. In a paper by Rademakers<sup>38</sup>, sample size and standard errors are each given for a Danish, a Dutch, a German and a Norwegian sample with a total of approx. 3500 patients. Back-calculation to the

1  
2  
3 standard deviation yields values between 14.49 and 14.61. In a study by Bates <sup>39</sup>, standard deviations  
4 between 14.3 and 14.8 were found. We, therefore, conservatively assume a standard deviation of 15  
5 in our planning. In the first study mentioned, a difference of 6.5 points was seen under intervention  
6 (68.5 vs 75.0). With a study effect in the control group (e.g. caused by using the instrument twice) of  
7 30% (= 1.95 points), we could expect a difference of 4.55 points. Conservatively assuming a difference  
8 of 4 points and the already justified standard deviation of 15 points in the main outcome parameter  
9 PAM-13 between intervention and control group, a sample size of 669 patients is calculated (type 2  
10 error of 0.10 and ratio of 2:1 between intervention n=446, and control group, n=223). Assuming a  
11 drop-out of 30%, 638 patients must be included in the intervention group, and 319 must be included  
12 in the control group. For pragmatic considerations regarding the implementation character of the  
13 study (existing staff, established structures), we aim to recruit 1000 patients in the intervention group  
14 and 500 patients in the control group (see Fig.4). With a sample size of 1500 patients (1000+500) minus  
15 30% dropouts, a group difference of 3.2 points on the PAM-13 would have a power of 90%. By adjusting  
16 the baseline in a covariance analysis, a degree of freedom is lost, but it can be assumed that the power  
17 should be even higher due to the reduction in dispersion after adjustment.

18 For the reference group, health insurance data will be used

19  
20  
21  
22  
23  
24  
25  
26  
27  
28  
29  
30 Please insert Fig 4 here

### 31 32 33 34 **Data analysis**

35 Electronic data collection from the patients' questionnaires is recorded using REDCap (Research  
36 Electronic Data Capture), a browser-based software for clinical and translational research <sup>40</sup>. All  
37 quantitative data will be transformed and imported into SPSS for further statistical analysis.

38  
39 Analysis of primary data outcomes: The primary outcome parameter for the comparison of the  
40 intervention group with the control group is patient activation, which is measured by the Patient  
41 Activation Measure PAM-13 after 3 months. For the primary outcome analysis of covariance will be  
42 applied with baseline adjustment and adjustment for study centre as a categorical variable. Secondary  
43 analyses of the primary endpoint include an additional analysis of covariance adjusted for age  
44 (quantitative), sex, diagnosis, and disease stage, as well as a mixed model for T1, T2 and T3 to analyse  
45 the temporal trend and test for maintenance effects at T3. Quantitative secondary endpoints will be  
46 analysed analogously to PAM, categorical data will be analysed using identically adjusted logistic  
47 regression models. For analyses of the secondary outcomes, p-values are reported but are not to be  
48 interpreted as confirmatory. The primary analysis population will be the intent to treat a population  
49 which includes all subjects with a baseline assessment. Multiple imputation methods are used to  
50 replace missing values. Imputation will be based on baseline values. Confirmatory interim analyses are  
51 not planned. The level of significance will be 0.05 (two-sided).



1  
2  
3 Analysis of routine data outcomes: Routine data outcomes as described above will be compared  
4 between the intervention, the control and the reference group. In a first step, routine data outcomes  
5 of the control group will be compared to the reference group to assess possible selection bias due to  
6 the fact that study patients are all treated at the CCCs. In a second step, routine data outcomes of the  
7 intervention group are compared to the control group with adjustments derived from the first step  
8 comparison.

### 13 14 15 16 **Process evaluation**

17 In addition to the analyses mentioned above, a detailed qualitative-quantitative process evaluation  
18 will be conducted. This process evaluation is based on the Consolidated Framework for  
19 Implementation Research (CFIR), a recognised framework in implementation research <sup>41</sup>. In addition  
20 to evaluating the perspectives of patients and providers on the counselling sessions, the process  
21 evaluation aims to identify significant barriers and facilitate factors for successful implementation and  
22 later transferability of the intervention into standard care. All details regarding the concept and  
23 planned analyses can be found in a separate publication (in preparation).

### 30 31 32 **Health economic evaluation**

33 To evaluate the intervention's efficiency, a cost-effectiveness and cost-utility analysis will be  
34 performed. To that end, the intervention and control groups will be compared on both the absolute  
35 and incremental costs and effects of care. The main analysis is conducted from the perspective of the  
36 insureds of the statutory health insurances, meaning that costs and effects incurred by the statutory  
37 health insurance as well as by the patients themselves are counted. A societal perspective will be  
38 considered in a sensitivity analysis. On the cost side, the intervention specific costs, the costs of  
39 inpatient and outpatient care, the costs of prescription drugs, therapeutic remedies, aids, informal  
40 care, productivity losses and CIH are considered. Data is collected using an adapted version of the  
41 healthcare utilization questionnaire (HCU-Q) <sup>42</sup> and supplemented for part of the intervention and  
42 control group with information from the AOK BW routine data (billing data). Using an incremental cost-  
43 effectiveness ratio, the efficiency of the intervention is quantified. This enables statements to be made  
44 about the programme's incremental costs per increment in quality of life and patient activation. Data  
45 from the reference group supplement and validate the data and analyses used and help contextualise  
46 the results. The time horizon of the analysis is 6 months. Both costs and effects are discounted at 3%  
47 p.a.. In a deterministic sensitivity analysis, discounting rates of both 0% and 5% will be applied.  
48 Uncertainty will be accounted for in the sensitivity as well as subgroup analyses.

## **Trial Status**

Recruitment of the control group (n=502) was successfully completed in January 2021. The counselling for the intervention group started in January 2021. Last-Patient out is expected for March 2022. Analyses will be completed in December 2022.

## **Patient and public involvement**

Patients from different oncological support groups were involved during the preparation of the study. The questionnaires and patient informational materials on CIH used in the study were developed in cooperation with support groups. Given the nature of our naturalistically controlled trial, the public and media were addressed actively with information on the project, and lectures on CIH were held on patient days etc., in order to achieve our recruitment goal.

## **Ethical considerations, data protection aspects and dissemination**

The study has been approved by the appropriate Institutional Ethical Committee of the participating medical faculties (Freiburg, Heidelberg, Tuebingen, Ulm), No. 658/2019BO1.

Before study entry, all study participants are comprehensively informed about the project and a written declaration of consent for participation is obtained. Access to the new form of care is open to all patients, regardless of their particular statutory health insurance company. There are no additional costs or disadvantages for the participating patients. Patients' participation is voluntary. Participants will be informed verbally and in writing about the nature and scope of the planned procedure before the start of the study. Given informed consent, including the processing of patients' data, documented by signing the consent form, can be withdrawn at any time and without giving reasons. Disclosure takes place in pseudonymised form for the analysis. The names of the participating patients and all other confidential information are subject to medical confidentiality and the provisions of the EU Data Protection Regulation of 25<sup>th</sup> May 2018.

A comprehensive data protection concept with a data set prescription of the routine data was developed for the handling, transfer, and analysis of all data within the project. Contracts of data protection and for order processing were concluded with the partners. The partners are guided by the applicable standard for research projects and by the applicable data protection regulations. Approval according to §75 SGB 5 for the transfer of social data for research was obtained from the AOK Baden-Wuerttemberg.

After completion of the analyses, the data will be made available upon reasonable request in anonymized form in accordance with the institutional regulations and the General Data Protection Regulation (exception is the health insurance data of the reference group).

1  
2  
3 The study results will be presented to academic audiences through publication in peer-reviewed  
4 journals and presentations at national and international conferences. The results will also be  
5 disseminated in the community. The study is being conducted in collaboration with a health  
6 insurance company. The process evaluation will also include the identification of significant barriers  
7 and facilitating factors for implementation. If the evaluation of the project is successful, a transfer  
8 into standard care is planned.  
9  
10  
11  
12  
13  
14

### 15 **Authors' contributions**

16  
17 SJ, CM, JV and RS conceptualised the design of the trial and interventions. All authors except PM, JF,  
18 KT were involved in the final elaboration of the intervention components. PM conducted the sample  
19 size calculation and contributed to the section on statistical methods. JV, DF and SJ wrote the first  
20 draft of this article. RS, CM, PM, NK, MH, JF, KK, HB, BG and KT critically revised it. JF contributed to  
21 the section on the health economic evaluation. All authors read and approved the final version of the  
22 manuscript.  
23  
24  
25  
26  
27  
28  
29

### 30 **Collaborators**

31 The CCC-Integrativ study group (in alphabetical order):

32  
33  
34 A. Schmitt, B. Kröger, B. Noack, B. Wattenberg, E. Kaschdailewitsch, H. Mauch, K. Gauß, K. Harder, L.  
35 Lohmüller, Institute for General Practice and Interprofessional Care, University Hospital and Faculty  
36 of Medicine Tuebingen, Germany; A. Seckinger, D. Zips, K. Müller, Comprehensive Cancer Center  
37 Tübingen-Stuttgart, Germany; E. Winkler, M. Busacker-Scharpff, M. Hoffmann, M. Krug, M. Reuter, S.  
38 Eismann, Department of Medical Oncology, National Centre for Tumor Diseases, Heidelberg,  
39 Germany; A. Kestler, B. Leicht, C. Nagat, C. Raff, F. Rapp, K. Kraus, W. Kmietschak, Department of  
40 Integrative Medicine, University Hospital and Faculty of Medicine Ulm, Germany; A. Battran, A.  
41 Frohn, B. Held, C. Perinchery, C. Pfister-Jimenéz, Department of Medicine I, Medical Centre  
42 University of Freiburg, Faculty of Medicine, University of Freiburg, Germany; H. Dürsch, J. Bossert, J.  
43 Szecsenyi, M. Wensing, Department of General Practice and Health Services Research, University  
44 Hospital Heidelberg, Germany; A. Kaltenbach, U. Boltenhagen, Department of Nursing Science,  
45 Institute for Health Sciences, University Hospital and Faculty of Medicine Tuebingen, Germany; A.  
46 Behzad, A. Leppert. B. Stein, Department of Internal Medicine, Division of Pneumology, Paracelsus  
47 Medical University, Klinikum Nuernberg, Germany; B. Broge, C. Witte, aQua Institute for Applied  
48 Quality Improvement and Research in Health Care, Goettingen, Germany; S. Treffert, AOK Baden-  
49 Württemberg  
50  
51  
52  
53  
54  
55  
56  
57  
58  
59  
60

## Funding statement

This work was supported by the Innovationsfonds of the Federal Joint Committee 2019-2022 Grant number: 01NVF18004

## Competing interests statement.

The authors JV, DF, RS, CM, PM, NK, MH, JF, KK, HB, BG and KT and SF declare that they do not have any competing interests.

## Acknowledgements

The authors gratefully thank native English speaker Hannah Fuhr for reviewing this manuscript.

## Figure legends

Fig. 1: Theoretical model for outcomes on patient level

Fig. 2: Outcomes framework for CCC-Integrativ

Fig. 3: CCC-Integrativ counselling model of the intervention

Fig. 4: Flowchart data collection (T1-T3)/ routine data

## References

1. Horneber M, Bueschel G, Dennert G, et al. How many cancer patients use complementary and alternative medicine: a systematic review and metaanalysis. *Integr Cancer Ther* 2012;11(3):187-203. doi: 10.1177/1534735411423920 [published Online First: 2011/10/25]
2. Boon HS, Olatunde F, Zick SM. Trends in complementary/alternative medicine use by breast cancer survivors: comparing survey data from 1998 and 2005. *BMC women's health* 2007;7:4. doi: 10.1186/1472-6874-7-4 [published Online First: 2007/04/03]
3. Leitlinienprogramm Onkologie der Arbeitsgemeinschaft der Wissenschaftlichen Medizinischen Fachgesellschaften e.V. (AWMF) DKeVDuDKD. Konsultationsfassung S3-Leitlinie Komplementärmedizin in der Behandlung von onkologischen PatientInnen, 2020.
4. Greenlee H, DuPont-Reyes MJ, Balneaves LG, et al. Clinical practice guidelines on the evidence-based use of integrative therapies during and after breast cancer treatment. *CA Cancer J Clin* 2017;67(3):194-232. doi: 10.3322/caac.21397 [published Online First: 2017/04/25]
5. Lyman GH, Greenlee H, Bohlke K, et al. Integrative Therapies During and After Breast Cancer Treatment: ASCO Endorsement of the SIO Clinical Practice Guideline. *J Clin Oncol* 2018;36(25):2647-55. doi: 10.1200/jco.2018.79.2721 [published Online First: 2018/06/12]
6. Yeh GY, Chan CW, Wayne PM, et al. The Impact of Tai Chi Exercise on Self-Efficacy, Social Support, and Empowerment in Heart Failure: Insights from a Qualitative Sub-Study from a Randomized Controlled Trial. *PLoS One* 2016;11(5):e0154678. doi: 10.1371/journal.pone.0154678 [published Online First: 2016/05/14]
7. Hibbard JH, Mahoney ER, Stockard J, et al. Development and testing of a short form of the patient activation measure. *Health Serv Res* 2005;40(6 Pt 1):1918-30. doi: 10.1111/j.1475-6773.2005.00438.x [published Online First: 2005/12/13]
8. Nagel G, Schreiber D. Patientenkompetenz und Selfempowerment bei Patientinnen mit Brustkrebs im Frühstadium: Ein Modell der Kompetenzberatung. *Deutsche Zeitschrift für Onkologie* 2012;44(04):140-50. doi: 10.1055/s-0032-1314718
9. Schaeffer D, Hurrlemann K, Bauer U, et al. Nationaler Aktionsplan Gesundheitskompetenz. Die Gesundheitskompetenz in Deutschland stärken. Berlin: KomPart 2018.
10. Bravo P, Edwards A, Barr PJ, et al. Conceptualising patient empowerment: a mixed methods study. *BMC Health Serv Res* 2015;15:252:252. doi: 10.1186/s12913-015-0907-z [published Online First: 2015/07/02]
11. Palumbo R. Examining the impacts of health literacy on healthcare costs. An evidence synthesis. *Health Serv Manage Res* 2017;30(4):197-212. doi: 10.1177/0951484817733366 [published Online First: 2017/10/17]
12. Alexander JA, Hearld LR, Mittler JN, et al. Patient-physician role relationships and patient activation among individuals with chronic illness. *Health Serv Res* 2012;47(3 Pt 1):1201-23. doi: 10.1111/j.1475-6773.2011.01354.x [published Online First: 2011/11/22]
13. Ben-Arye E, Samuels N, Goldstein LH, et al. Potential risks associated with traditional herbal medicine use in cancer care: A study of Middle Eastern oncology health care professionals. *Cancer* 2016;122(4):598-610. doi: 10.1002/cncr.29796 [published Online First: 2015/11/26]
14. Posadzki P, Watson LK, Ernst E. Adverse effects of herbal medicines: an overview of systematic reviews. *Clin Med (Lond)* 2013;13(1):7-12. doi: 10.7861/clinmedicine.13-1-7 [published Online First: 2013/03/12]
15. Johnson SB, Park HS, Gross CP, et al. Complementary Medicine, Refusal of Conventional Cancer Therapy, and Survival Among Patients With Curable Cancers. *JAMA Oncology* 2018;4(10):1375-81. doi: 10.1001/jamaoncol.2018.2487
16. Hayward RA, Asch SM, Hogan MM, et al. Sins of omission: getting too little medical care may be the greatest threat to patient safety. *J Gen Intern Med* 2005;20(8):686-91. doi: 10.1111/j.1525-1497.2005.0152.x [published Online First: 2005/07/30]
17. Wardle JL, Adams J. Indirect and non-health risks associated with complementary and alternative medicine use: An integrative review. *European journal of integrative medicine* 2014;6(4):409-22. doi: <https://doi.org/10.1016/j.eujim.2014.01.001>

18. Davis EL, Oh B, Butow PN, et al. Cancer patient disclosure and patient-doctor communication of complementary and alternative medicine use: a systematic review. *Oncologist* 2012;17(11):1475-81. doi: 10.1634/theoncologist.2012-0223 [published Online First: 2012/08/31]
19. Sanford NN, Sher DJ, Ahn C, et al. Prevalence and Nondisclosure of Complementary and Alternative Medicine Use in Patients With Cancer and Cancer Survivors in the United States. *JAMA Oncology* 2019;5(5):735-37. doi: 10.1001/jamaoncol.2019.0349
20. Arslan C, Guler M. Alternative medicine usage among solid tumour patients receiving chemotherapy. *Eur J Cancer Care (Engl)* 2017;26(5) doi: 10.1111/ecc.12530 [published Online First: 2016/06/22]
21. Hübner J. Chemotherapie. In: Hübner J, ed. *Onkologie Interdisziplinär*. Stuttgart: Schatauer 2014:54-61.
22. Shalom-Sharabi I, Samuels N, Lev E, et al. Impact of a complementary/integrative medicine program on the need for supportive cancer care-related medications. *Support Care Cancer* 2017;25(10):3181-90. doi: 10.1007/s00520-017-3726-4 [published Online First: 2017/04/24]
23. Coolbrandt A, Wildiers H, Aertgeerts B, et al. Characteristics and effectiveness of complex nursing interventions aimed at reducing symptom burden in adult patients treated with chemotherapy: a systematic review of randomized controlled trials. *Int J Nurs Stud* 2014;51(3):495-510. doi: 10.1016/j.ijnurstu.2013.08.008 [published Online First: 2013/10/01]
24. D'Egidio V, Sestili C, Mancino M, et al. Counseling interventions delivered in women with breast cancer to improve health-related quality of life: a systematic review. *Qual Life Res* 2017;26(10)(10):2573-92. doi: 10.1007/s11136-017-1613-6 [published Online First: 2017/06/18]
25. Chambers SK, Hyde MK, Smith DP, et al. New Challenges in Psycho-Oncology Research III: A systematic review of psychological interventions for prostate cancer survivors and their partners: clinical and research implications. *Psycho-oncology* 2017;26(7):873-913. doi: 10.1002/pon.4431 [published Online First: 2017/07/12]
26. Kreienberg R, Albert U, Follmann M, et al. *Interdisziplinäre S3-Leitlinie für Diagnostik, Therapie und Nachsorge des Mammakarzinoms, 2012:1-104*.
27. Lederle M, Weltzien D, Bitzer EM. Führt die Steigerung von Gesundheitskompetenz und Selbstmanagement zu einer angemesseneren Inanspruchnahme gesundheitlicher Leistungen? *Gesundheitswesen* 2017;79(08/09)(08/09):656-804.
28. Klein GE, Guethlin C. Information and Training Needs Regarding Complementary and Alternative Medicine: A Cross-sectional Study of Cancer Care Providers in Germany. *Integr Cancer Ther* 2018;17(2):380-87. doi: 10.1177/1534735416666372 [published Online First: 2016/09/03]
29. Blödt S, Mittring N, Schützl L, et al. A consultation training program for physicians for communication about complementary medicine with breast cancer patients: a prospective, multi-center, cluster-randomized, mixed-method pilot study. *BMC Cancer* 2016;16(1):843. doi: 10.1186/s12885-016-2884-y [published Online First: 2016/11/05]
30. Klafke N, Mahler C, von Hagens C, et al. A complex nursing intervention of complementary and alternative medicine (CAM) to increase quality of life in patients with breast and gynecologic cancer undergoing chemotherapy (CONGO study): study protocol for a partially randomized patient preference trial. *Trials* 2015;16(51):51. doi: 10.1186/s13063-014-0538-4 [published Online First: 2015/04/19]
31. Self-efficacy in women experiencing Complementary and Alternative Medicine in CONGO-study. International Council of Nursing (ICN) Congress; 2017; Barcelona, Spain.
32. National Research Center in Complementary and Alternative Medicine (NAFKAM) UTAUoN. <https://cam-cancer.org/en>: National Research Center in Complementary and Alternative Medicine (NAFKAM), UiT The Arctic University of Norway; 2021 [accessed 11.06. 2021].
33. Orchard C, Burse, S., Peterson, L., Verrilli, S. Can Workshops Provide a Way to Enhance Patient/Client Centered Collaborative Teams?: Evidence of Outcomes from TEAMc Online Facilitator Training and Team Workshops?: Evidence of Outcomes from TEAMc Online Facilitator Training and Team Workshops. *International Journal of Practice-based Learning in Health and Social Care* 2016;4 No 2:73-87.

- 1  
2  
3 34. Orchard C. <https://teamc.ca> 2007 [accessed 22.05. 2021].
- 4 35. Brenk-Franz K, Hibbard JH, Herrmann WJ, et al. Validation of the German version of the patient  
5 activation measure 13 (PAM13-D) in an international multicentre study of primary care  
6 patients. *PLoS One* 2013;8(9):e74786. doi: 10.1371/journal.pone.0074786 [published Online  
7 First: 2013/10/08]
- 8 36. Zill JM, Dwinger S, Kriston L, et al. Psychometric evaluation of the German version of the Patient  
9 Activation Measure (PAM13). *BMC Public Health* 2013;13:1027. doi: 10.1186/1471-2458-13-  
10 1027 [published Online First: 2013/11/01]
- 11 37. Jansen F, Coupé VMH, Eerenstein SEJ, et al. Costs from a healthcare and societal perspective among  
12 cancer patients after total laryngectomy: are they related to patient activation? *Support Care*  
13 *Cancer* 2018;26(4):1221-31. doi: 10.1007/s00520-017-3945-8 [published Online First:  
14 2017/11/04]
- 15 38. Rademakers J, Maindal HT, Steinsbekk A, et al. Patient activation in Europe: an international  
16 comparison of psychometric properties and patients' scores on the short form Patient  
17 Activation Measure (PAM-13). *BMC Health Serv Res* 2016;16(1):570. doi: 10.1186/s12913-016-  
18 1828-1 [published Online First: 2016/10/13]
- 19 39. Bates JS, Auten J, Sketch MR, et al. Patient engagement in first cycle comprehensive chemotherapy  
20 consultation pharmacist services and impact on patient activation. *J Oncol Pharm Pract*  
21 2019;25(4):896-902. doi: 10.1177/1078155219832644 [published Online First: 2019/02/28]
- 22 40. Harris PA, Taylor R, Thielke R, et al. Research electronic data capture (REDCap)—A metadata-driven  
23 methodology and workflow process for providing translational research informatics support.  
24 *Journal of Biomedical Informatics* 2009;42(2):377-81. doi:  
25 <https://doi.org/10.1016/j.jbi.2008.08.010>
- 26 41. Kirk MA, Kelley C, Yankey N, et al. A systematic review of the use of the Consolidated Framework  
27 for Implementation Research. *Implement Sci* 2016;11:72. doi: 10.1186/s13012-016-0437-z  
28 [published Online First: 2016/05/18]
- 29 42. Weiss FD, Mewes R, Rief W, et al. HCU-Q: Entwicklung eines Fragebogens zur Erfassung der  
30 Inanspruchnahme medizinischer Gesundheitsleistungen. *Verhaltenstherapie* 2018;28(1):15-  
31 24. doi: 10.1159/000478028
- 32  
33  
34  
35  
36  
37  
38  
39  
40  
41  
42  
43  
44  
45  
46  
47  
48  
49  
50  
51  
52  
53  
54  
55  
56  
57  
58  
59  
60

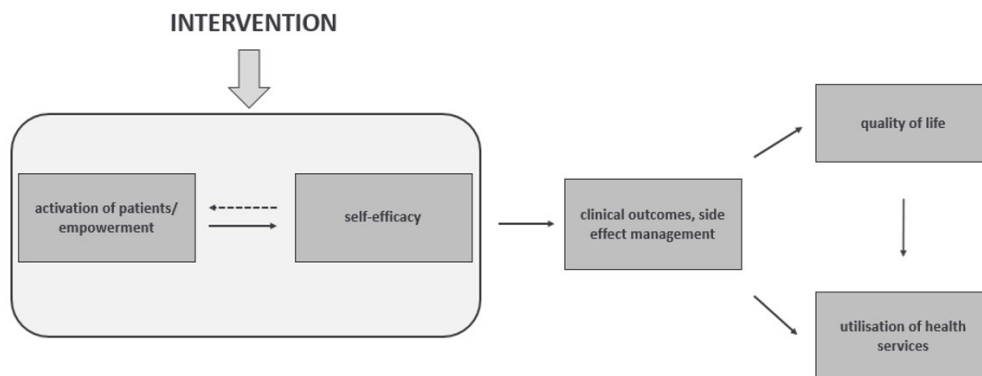

Fig. 1 Theoretical model for outcomes on patient level

308x122mm (95 x 95 DPI)



1  
2  
3  
4  
5  
6  
7  
8  
9  
10  
11  
12  
13  
14  
15  
16  
17  
18  
19  
20  
21  
22  
23  
24  
25  
26  
27  
28  
29  
30  
31  
32  
33  
34  
35  
36  
37  
38  
39  
40  
41  
42  
43  
44  
45  
46  
47  
48  
49  
50  
51  
52  
53  
54  
55  
56  
57  
58  
59  
60



Fig. 2 Outcomes framework for CCC-Integrativ

165x97mm (96 x 96 DPI)

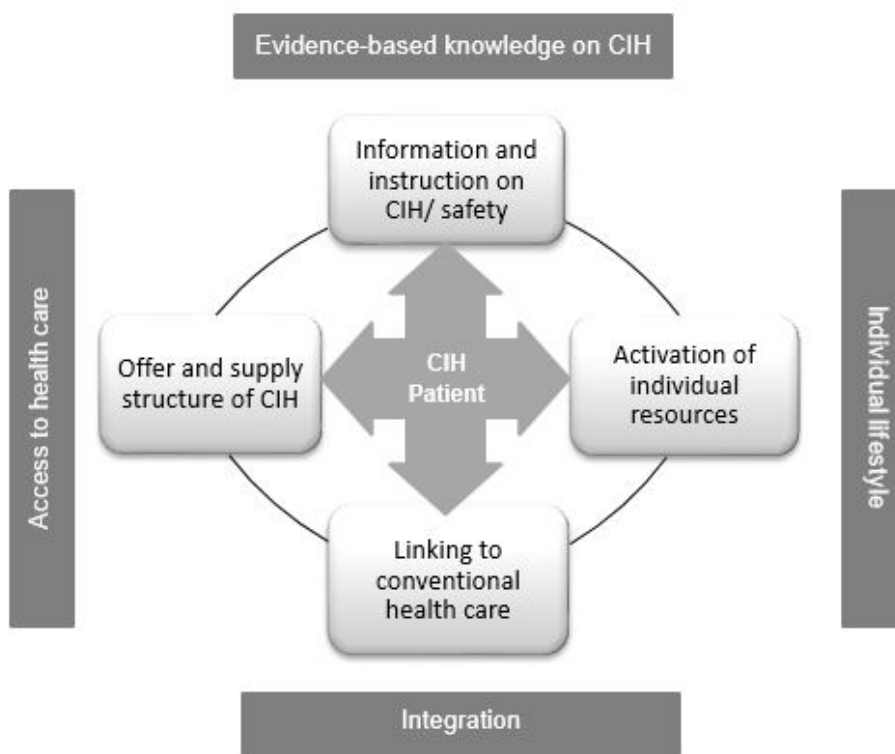

Fig. 3 CCC-Integrativ counselling model of the intervention

137x114mm (96 x 96 DPI)

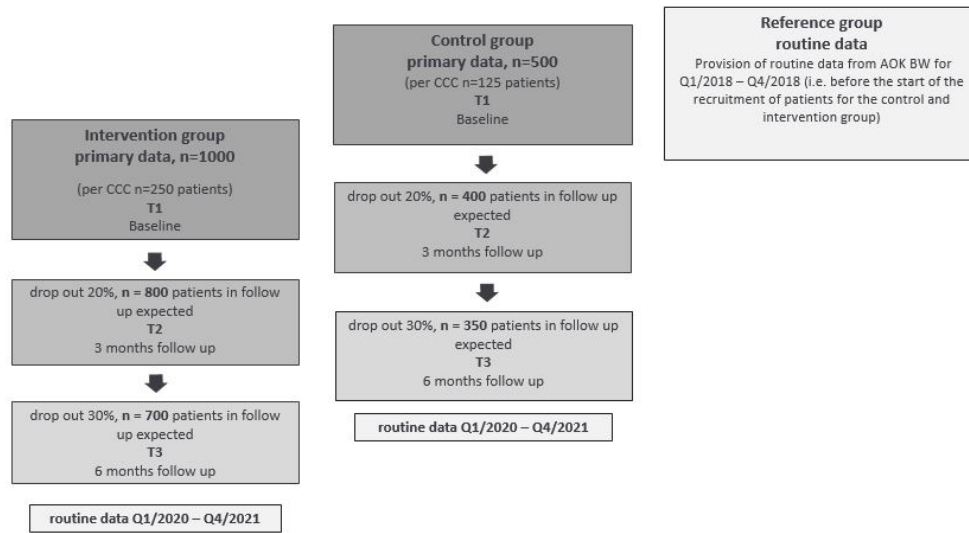

Fig. 4 Flowchart data collection (T1-T3)/ routine data

223x121mm (96 x 96 DPI)

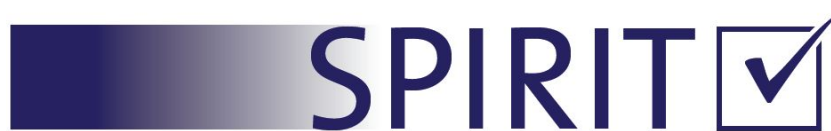

STANDARD PROTOCOL ITEMS: RECOMMENDATIONS FOR INTERVENTIONAL TRIALS

SPIRIT 2013 Checklist: Recommended items to address in a clinical trial protocol and related documents\*

| Section/item                      | ItemNo | Description                                                                                                                                                                                                                                                                              | Page |
|-----------------------------------|--------|------------------------------------------------------------------------------------------------------------------------------------------------------------------------------------------------------------------------------------------------------------------------------------------|------|
| <b>Administrative information</b> |        |                                                                                                                                                                                                                                                                                          |      |
| Title                             | 1      | Descriptive title identifying the study design, population, interventions, and, if applicable, trial acronym                                                                                                                                                                             | 1    |
| Trial registration                | 2a     | Trial identifier and registry name. If not yet registered, name of intended registry                                                                                                                                                                                                     | 2    |
|                                   | 2b     | All items from the World Health Organization Trial Registration Data Set                                                                                                                                                                                                                 | NA   |
| Protocol version                  | 3      | Date and version identifier                                                                                                                                                                                                                                                              | NA   |
| Funding                           | 4      | Sources and types of financial, material, and other support                                                                                                                                                                                                                              | 16   |
| Roles and responsibilities        | 5a     | Names, affiliations, and roles of protocol contributors                                                                                                                                                                                                                                  | 1    |
|                                   | 5b     | Name and contact information for the trial sponsor                                                                                                                                                                                                                                       | NA   |
|                                   | 5c     | Role of study sponsor and funders, if any, in study design; collection, management, analysis, and interpretation of data; writing of the report; and the decision to submit the report for publication, including whether they will have ultimate authority over any of these activities | NA   |
|                                   | 5d     | Composition, roles, and responsibilities of the coordinating centre, steering committee, endpoint adjudication committee, data management team, and other individuals or groups overseeing the trial, if applicable (see Item 21a for data monitoring committee)                         | NA   |
| <b>Introduction</b>               |        |                                                                                                                                                                                                                                                                                          |      |
| Background and rationale          | 6a     | Description of research question and justification for undertaking the trial, including summary of relevant studies (published and unpublished) examining benefits and harms for each intervention                                                                                       | 4    |
|                                   | 6b     | Explanation for choice of comparators                                                                                                                                                                                                                                                    | 5/6  |
| Objectives                        | 7      | Specific objectives or hypotheses                                                                                                                                                                                                                                                        | 5    |

|    |                                                                     |     |                                                                                                                                                                                                                                                                                                                                                                                |        |
|----|---------------------------------------------------------------------|-----|--------------------------------------------------------------------------------------------------------------------------------------------------------------------------------------------------------------------------------------------------------------------------------------------------------------------------------------------------------------------------------|--------|
| 1  |                                                                     |     |                                                                                                                                                                                                                                                                                                                                                                                |        |
| 2  | Trial design                                                        | 8   | Description of trial design including type of trial (eg, parallel group, crossover, factorial, single group), allocation ratio, and framework (eg, superiority, equivalence, noninferiority, exploratory)                                                                                                                                                                      | 5/6    |
| 3  |                                                                     |     |                                                                                                                                                                                                                                                                                                                                                                                |        |
| 4  |                                                                     |     |                                                                                                                                                                                                                                                                                                                                                                                |        |
| 5  |                                                                     |     |                                                                                                                                                                                                                                                                                                                                                                                |        |
| 6  |                                                                     |     |                                                                                                                                                                                                                                                                                                                                                                                |        |
| 7  |                                                                     |     |                                                                                                                                                                                                                                                                                                                                                                                |        |
| 8  | <b>Methods: Participants, interventions, and outcomes</b>           |     |                                                                                                                                                                                                                                                                                                                                                                                |        |
| 9  |                                                                     |     |                                                                                                                                                                                                                                                                                                                                                                                |        |
| 10 | Study setting                                                       | 9   | Description of study settings (eg, community clinic, academic hospital) and list of countries where data will be collected. Reference to where list of study sites can be obtained                                                                                                                                                                                             | 5/6    |
| 11 |                                                                     |     |                                                                                                                                                                                                                                                                                                                                                                                |        |
| 12 |                                                                     |     |                                                                                                                                                                                                                                                                                                                                                                                |        |
| 13 |                                                                     |     |                                                                                                                                                                                                                                                                                                                                                                                |        |
| 14 | Eligibility criteria                                                | 10  | Inclusion and exclusion criteria for participants. If applicable, eligibility criteria for study centres and individuals who will perform the interventions (eg, surgeons, psychotherapists)                                                                                                                                                                                   | 7/8    |
| 15 |                                                                     |     |                                                                                                                                                                                                                                                                                                                                                                                |        |
| 16 |                                                                     |     |                                                                                                                                                                                                                                                                                                                                                                                |        |
| 17 |                                                                     |     |                                                                                                                                                                                                                                                                                                                                                                                |        |
| 18 |                                                                     |     |                                                                                                                                                                                                                                                                                                                                                                                |        |
| 19 | Interventions                                                       | 11a | Interventions for each group with sufficient detail to allow replication, including how and when they will be administered                                                                                                                                                                                                                                                     | 7/9/10 |
| 20 |                                                                     |     |                                                                                                                                                                                                                                                                                                                                                                                |        |
| 21 |                                                                     |     |                                                                                                                                                                                                                                                                                                                                                                                |        |
| 22 |                                                                     | 11b | Criteria for discontinuing or modifying allocated interventions for a given trial participant (eg, drug dose change in response to harms, participant request, or improving/worsening disease)                                                                                                                                                                                 | NA     |
| 23 |                                                                     |     |                                                                                                                                                                                                                                                                                                                                                                                |        |
| 24 |                                                                     |     |                                                                                                                                                                                                                                                                                                                                                                                |        |
| 25 |                                                                     |     |                                                                                                                                                                                                                                                                                                                                                                                |        |
| 26 |                                                                     |     |                                                                                                                                                                                                                                                                                                                                                                                |        |
| 27 |                                                                     |     |                                                                                                                                                                                                                                                                                                                                                                                |        |
| 28 |                                                                     | 11c | Strategies to improve adherence to intervention protocols, and any procedures for monitoring adherence (eg, drug tablet return, laboratory tests)                                                                                                                                                                                                                              | NA     |
| 29 |                                                                     |     |                                                                                                                                                                                                                                                                                                                                                                                |        |
| 30 |                                                                     |     |                                                                                                                                                                                                                                                                                                                                                                                |        |
| 31 |                                                                     |     |                                                                                                                                                                                                                                                                                                                                                                                |        |
| 32 |                                                                     | 11d | Relevant concomitant care and interventions that are permitted or prohibited during the trial                                                                                                                                                                                                                                                                                  | NA     |
| 33 |                                                                     |     |                                                                                                                                                                                                                                                                                                                                                                                |        |
| 34 |                                                                     |     |                                                                                                                                                                                                                                                                                                                                                                                |        |
| 35 | Outcomes                                                            | 12  | Primary, secondary, and other outcomes, including the specific measurement variable (eg, systolic blood pressure), analysis metric (eg, change from baseline, final value, time to event), method of aggregation (eg, median, proportion), and time point for each outcome. Explanation of the clinical relevance of chosen efficacy and harm outcomes is strongly recommended | 10/11  |
| 36 |                                                                     |     |                                                                                                                                                                                                                                                                                                                                                                                |        |
| 37 |                                                                     |     |                                                                                                                                                                                                                                                                                                                                                                                |        |
| 38 |                                                                     |     |                                                                                                                                                                                                                                                                                                                                                                                |        |
| 39 |                                                                     |     |                                                                                                                                                                                                                                                                                                                                                                                |        |
| 40 |                                                                     |     |                                                                                                                                                                                                                                                                                                                                                                                |        |
| 41 |                                                                     |     |                                                                                                                                                                                                                                                                                                                                                                                |        |
| 42 |                                                                     |     |                                                                                                                                                                                                                                                                                                                                                                                |        |
| 43 |                                                                     |     |                                                                                                                                                                                                                                                                                                                                                                                |        |
| 44 |                                                                     |     |                                                                                                                                                                                                                                                                                                                                                                                |        |
| 45 | Participant timeline                                                | 13  | Time schedule of enrolment, interventions (including any run-ins and washouts), assessments, and visits for participants. A schematic diagram is highly recommended (see Figure)                                                                                                                                                                                               | 9      |
| 46 |                                                                     |     |                                                                                                                                                                                                                                                                                                                                                                                |        |
| 47 |                                                                     |     |                                                                                                                                                                                                                                                                                                                                                                                |        |
| 48 |                                                                     |     |                                                                                                                                                                                                                                                                                                                                                                                |        |
| 49 | Sample size                                                         | 14  | Estimated number of participants needed to achieve study objectives and how it was determined, including clinical and statistical assumptions supporting any sample size calculations                                                                                                                                                                                          | 11/12  |
| 50 |                                                                     |     |                                                                                                                                                                                                                                                                                                                                                                                |        |
| 51 |                                                                     |     |                                                                                                                                                                                                                                                                                                                                                                                |        |
| 52 |                                                                     |     |                                                                                                                                                                                                                                                                                                                                                                                |        |
| 53 |                                                                     |     |                                                                                                                                                                                                                                                                                                                                                                                |        |
| 54 |                                                                     |     |                                                                                                                                                                                                                                                                                                                                                                                |        |
| 55 | Recruitment                                                         | 15  | Strategies for achieving adequate participant enrolment to reach target sample size                                                                                                                                                                                                                                                                                            | 8      |
| 56 |                                                                     |     |                                                                                                                                                                                                                                                                                                                                                                                |        |
| 57 |                                                                     |     |                                                                                                                                                                                                                                                                                                                                                                                |        |
| 58 | <b>Methods: Assignment of interventions (for controlled trials)</b> |     |                                                                                                                                                                                                                                                                                                                                                                                |        |
| 59 |                                                                     |     |                                                                                                                                                                                                                                                                                                                                                                                |        |
| 60 |                                                                     |     |                                                                                                                                                                                                                                                                                                                                                                                |        |

## Allocation:

|                                  |     |                                                                                                                                                                                                                                                                                                                                                          |    |
|----------------------------------|-----|----------------------------------------------------------------------------------------------------------------------------------------------------------------------------------------------------------------------------------------------------------------------------------------------------------------------------------------------------------|----|
| Sequence generation              | 16a | Method of generating the allocation sequence (eg, computer-generated random numbers), and list of any factors for stratification. To reduce predictability of a random sequence, details of any planned restriction (eg, blocking) should be provided in a separate document that is unavailable to those who enrol participants or assign interventions | NA |
| Allocation concealment mechanism | 16b | Mechanism of implementing the allocation sequence (eg, central telephone; sequentially numbered, opaque, sealed envelopes), describing any steps to conceal the sequence until interventions are assigned                                                                                                                                                | NA |
| Implementation                   | 16c | Who will generate the allocation sequence, who will enrol participants, and who will assign participants to interventions                                                                                                                                                                                                                                | NA |
| Blinding (masking)               | 17a | Who will be blinded after assignment to interventions (eg, trial participants, care providers, outcome assessors, data analysts), and how                                                                                                                                                                                                                | NA |
|                                  | 17b | If blinded, circumstances under which unblinding is permissible, and procedure for revealing a participant's allocated intervention during the trial                                                                                                                                                                                                     | NA |

**Methods: Data collection, management, and analysis**

|                         |     |                                                                                                                                                                                                                                                                                                                                                                                                              |       |
|-------------------------|-----|--------------------------------------------------------------------------------------------------------------------------------------------------------------------------------------------------------------------------------------------------------------------------------------------------------------------------------------------------------------------------------------------------------------|-------|
| Data collection methods | 18a | Plans for assessment and collection of outcome, baseline, and other trial data, including any related processes to promote data quality (eg, duplicate measurements, training of assessors) and a description of study instruments (eg, questionnaires, laboratory tests) along with their reliability and validity, if known. Reference to where data collection forms can be found, if not in the protocol | 12/13 |
|                         | 18b | Plans to promote participant retention and complete follow-up, including list of any outcome data to be collected for participants who discontinue or deviate from intervention protocols                                                                                                                                                                                                                    | 12/13 |
| Data management         | 19  | Plans for data entry, coding, security, and storage, including any related processes to promote data quality (eg, double data entry; range checks for data values). Reference to where details of data management procedures can be found, if not in the protocol                                                                                                                                            | 12-15 |
| Statistical methods     | 20a | Statistical methods for analysing primary and secondary outcomes. Reference to where other details of the statistical analysis plan can be found, if not in the protocol                                                                                                                                                                                                                                     | 12/13 |
|                         | 20b | Methods for any additional analyses (eg, subgroup and adjusted analyses)                                                                                                                                                                                                                                                                                                                                     | 12/13 |

|    |  |     |                                                             |       |
|----|--|-----|-------------------------------------------------------------|-------|
| 1  |  |     |                                                             |       |
| 2  |  | 20c | Definition of analysis population relating to protocol non- | 12/13 |
| 3  |  |     | adherence (eg, as randomised analysis), and any statistical |       |
| 4  |  |     | methods to handle missing data (eg, multiple imputation)    |       |
| 5  |  |     |                                                             |       |
| 6  |  |     |                                                             |       |
| 7  |  |     |                                                             |       |
| 8  |  |     |                                                             |       |
| 9  |  |     |                                                             |       |
| 10 |  |     |                                                             |       |
| 11 |  |     |                                                             |       |
| 12 |  |     |                                                             |       |
| 13 |  |     |                                                             |       |
| 14 |  |     |                                                             |       |
| 15 |  |     |                                                             |       |
| 16 |  |     |                                                             |       |
| 17 |  |     |                                                             |       |
| 18 |  |     |                                                             |       |
| 19 |  |     |                                                             |       |
| 20 |  |     |                                                             |       |
| 21 |  |     |                                                             |       |
| 22 |  |     |                                                             |       |
| 23 |  |     |                                                             |       |
| 24 |  |     |                                                             |       |
| 25 |  |     |                                                             |       |
| 26 |  |     |                                                             |       |
| 27 |  |     |                                                             |       |
| 28 |  |     |                                                             |       |
| 29 |  |     |                                                             |       |
| 30 |  |     |                                                             |       |
| 31 |  |     |                                                             |       |
| 32 |  |     |                                                             |       |
| 33 |  |     |                                                             |       |
| 34 |  |     |                                                             |       |
| 35 |  |     |                                                             |       |
| 36 |  |     |                                                             |       |
| 37 |  |     |                                                             |       |
| 38 |  |     |                                                             |       |
| 39 |  |     |                                                             |       |
| 40 |  |     |                                                             |       |
| 41 |  |     |                                                             |       |
| 42 |  |     |                                                             |       |
| 43 |  |     |                                                             |       |
| 44 |  |     |                                                             |       |
| 45 |  |     |                                                             |       |
| 46 |  |     |                                                             |       |
| 47 |  |     |                                                             |       |
| 48 |  |     |                                                             |       |
| 49 |  |     |                                                             |       |
| 50 |  |     |                                                             |       |
| 51 |  |     |                                                             |       |
| 52 |  |     |                                                             |       |
| 53 |  |     |                                                             |       |
| 54 |  |     |                                                             |       |
| 55 |  |     |                                                             |       |
| 56 |  |     |                                                             |       |
| 57 |  |     |                                                             |       |
| 58 |  |     |                                                             |       |
| 59 |  |     |                                                             |       |
| 60 |  |     |                                                             |       |

## Methods: Monitoring

|                                 |     |                                                                                                                                                                                                                                                                                                                                       |       |
|---------------------------------|-----|---------------------------------------------------------------------------------------------------------------------------------------------------------------------------------------------------------------------------------------------------------------------------------------------------------------------------------------|-------|
| Data monitoring                 | 21a | Composition of data monitoring committee (DMC); summary of its role and reporting structure; statement of whether it is independent from the sponsor and competing interests; and reference to where further details about its charter can be found, if not in the protocol. Alternatively, an explanation of why a DMC is not needed | 14/15 |
|                                 | 21b | Description of any interim analyses and stopping guidelines, including who will have access to these interim results and make the final decision to terminate the trial                                                                                                                                                               | NA    |
| Harms                           | 22  | Plans for collecting, assessing, reporting, and managing solicited and spontaneously reported adverse events and other unintended effects of trial interventions or trial conduct                                                                                                                                                     | 14/15 |
| Auditing                        | 23  | Frequency and procedures for auditing trial conduct, if any, and whether the process will be independent from investigators and the sponsor                                                                                                                                                                                           | NA    |
| <b>Ethics and dissemination</b> |     |                                                                                                                                                                                                                                                                                                                                       |       |
| Research ethics approval        | 24  | Plans for seeking research ethics committee/institutional review board (REC/IRB) approval                                                                                                                                                                                                                                             | 14/15 |
| Protocol amendments             | 25  | Plans for communicating important protocol modifications (eg, changes to eligibility criteria, outcomes, analyses) to relevant parties (eg, investigators, REC/IRBs, trial participants, trial registries, journals, regulators)                                                                                                      | NA    |
| Consent or assent               | 26a | Who will obtain informed consent or assent from potential trial participants or authorised surrogates, and how (see Item 32)                                                                                                                                                                                                          | 8     |
|                                 | 26b | Additional consent provisions for collection and use of participant data and biological specimens in ancillary studies, if applicable                                                                                                                                                                                                 | NA    |
| Confidentiality                 | 27  | How personal information about potential and enrolled participants will be collected, shared, and maintained in order to protect confidentiality before, during, and after the trial                                                                                                                                                  | 14/15 |
| Declaration of interests        | 28  | Financial and other competing interests for principal investigators for the overall trial and each study site                                                                                                                                                                                                                         | 16    |

|    |                               |     |                                                                                                                                                                                                                                                                                     |          |
|----|-------------------------------|-----|-------------------------------------------------------------------------------------------------------------------------------------------------------------------------------------------------------------------------------------------------------------------------------------|----------|
| 1  |                               |     |                                                                                                                                                                                                                                                                                     |          |
| 2  | Access to data                | 29  | Statement of who will have access to the final trial dataset, and disclosure of contractual agreements that limit such access for investigators                                                                                                                                     | 14/15    |
| 3  |                               |     |                                                                                                                                                                                                                                                                                     |          |
| 4  |                               |     |                                                                                                                                                                                                                                                                                     |          |
| 5  |                               |     |                                                                                                                                                                                                                                                                                     |          |
| 6  | Ancillary and post-trial care | 30  | Provisions, if any, for ancillary and post-trial care, and for compensation to those who suffer harm from trial participation                                                                                                                                                       | NA       |
| 7  |                               |     |                                                                                                                                                                                                                                                                                     |          |
| 8  |                               |     |                                                                                                                                                                                                                                                                                     |          |
| 9  |                               |     |                                                                                                                                                                                                                                                                                     |          |
| 10 |                               |     |                                                                                                                                                                                                                                                                                     |          |
| 11 | Dissemination policy          | 31a | Plans for investigators and sponsor to communicate trial results to participants, healthcare professionals, the public, and other relevant groups (eg, via publication, reporting in results databases, or other data sharing arrangements), including any publication restrictions | 14/15    |
| 12 |                               |     |                                                                                                                                                                                                                                                                                     |          |
| 13 |                               |     |                                                                                                                                                                                                                                                                                     |          |
| 14 |                               |     |                                                                                                                                                                                                                                                                                     |          |
| 15 |                               |     |                                                                                                                                                                                                                                                                                     |          |
| 16 |                               |     |                                                                                                                                                                                                                                                                                     |          |
| 17 |                               |     |                                                                                                                                                                                                                                                                                     |          |
| 18 |                               | 31b | Authorship eligibility guidelines and any intended use of professional writers                                                                                                                                                                                                      | NA       |
| 19 |                               |     |                                                                                                                                                                                                                                                                                     |          |
| 20 |                               |     |                                                                                                                                                                                                                                                                                     |          |
| 21 |                               | 31c | Plans, if any, for granting public access to the full protocol, participant-level dataset, and statistical code                                                                                                                                                                     | 15       |
| 22 |                               |     |                                                                                                                                                                                                                                                                                     |          |
| 23 |                               |     |                                                                                                                                                                                                                                                                                     |          |
| 24 |                               |     |                                                                                                                                                                                                                                                                                     |          |
| 25 | <b>Appendices</b>             |     |                                                                                                                                                                                                                                                                                     |          |
| 26 | Informed consent materials    | 32  | Model consent form and other related documentation given to participants and authorised surrogates                                                                                                                                                                                  | Appendix |
| 27 |                               |     |                                                                                                                                                                                                                                                                                     |          |
| 28 |                               |     |                                                                                                                                                                                                                                                                                     |          |
| 29 | Biological specimens          | 33  | Plans for collection, laboratory evaluation, and storage of biological specimens for genetic or molecular analysis in the current trial and for future use in ancillary studies, if applicable                                                                                      | NA       |
| 30 |                               |     |                                                                                                                                                                                                                                                                                     |          |
| 31 |                               |     |                                                                                                                                                                                                                                                                                     |          |
| 32 |                               |     |                                                                                                                                                                                                                                                                                     |          |
| 33 |                               |     |                                                                                                                                                                                                                                                                                     |          |
| 34 |                               |     |                                                                                                                                                                                                                                                                                     |          |

\*It is strongly recommended that this checklist be read in conjunction with the SPIRIT 2013 Explanation & Elaboration for important clarification on the items. Amendments to the protocol should be tracked and dated. The SPIRIT checklist is copyrighted by the SPIRIT Group under the Creative Commons "[Attribution-NonCommercial-NoDerivs 3.0 Unported](https://creativecommons.org/licenses/by-nc-nd/3.0/)" license.
